# Supplementary material for: Study protocol for a randomised controlled feasibility trial of a virtual intervention (STRIDE) for symptom management, distress and adherence to adjuvant endocrine therapy after breast cancer
Source: PubMed Central journal article supplement — BMJ Open. 2021 Jan 4;11(1):e041626. doi: 10.1136/bmjopen-2020-041626 (PMC7783524; doi:10.1136/bmjopen-2020-041626), 2021-01-04
Supplement: bmjopen-2020-041626.draft_revisions.pdf [file bmjopen-2020-041626.draft_revisions.pdf]

# BMJ Open

BMJ Open is committed to open peer review. As part of this commitment we make the peer review history of every article we publish publicly available.

When an article is published we post the peer reviewers' comments and the authors' responses online. We also post the versions of the paper that were used during peer review. These are the versions that the peer review comments apply to.

The versions of the paper that follow are the versions that were submitted during the peer review process. They are not the versions of record or the final published versions. They should not be cited or distributed as the published version of this manuscript.

BMJ Open is an open access journal and the full, final, typeset and author-corrected version of record of the manuscript is available on our site with no access controls, subscription charges or pay-per-view fees (<http://bmjopen.bmj.com>).

If you have any questions on BMJ Open's open peer review process please email [info.bmjopen@bmj.com](mailto:info.bmjopen@bmj.com)

# BMJ Open

## Study Protocol for a Randomized Controlled Feasibility Trial of a Virtual Intervention (STRIDE) for Symptom Management, Distress, and Adherence to Adjuvant Endocrine Therapy after Breast Cancer

|                               |                                                                                                                                                                                                                                                                                                                                                                                                                                                                                                                                                                                                                                                                                                                                                                                                                                                                                 |
|-------------------------------|---------------------------------------------------------------------------------------------------------------------------------------------------------------------------------------------------------------------------------------------------------------------------------------------------------------------------------------------------------------------------------------------------------------------------------------------------------------------------------------------------------------------------------------------------------------------------------------------------------------------------------------------------------------------------------------------------------------------------------------------------------------------------------------------------------------------------------------------------------------------------------|
| Journal:                      | <i>BMJ Open</i>                                                                                                                                                                                                                                                                                                                                                                                                                                                                                                                                                                                                                                                                                                                                                                                                                                                                 |
| Manuscript ID                 | bmjopen-2020-041626                                                                                                                                                                                                                                                                                                                                                                                                                                                                                                                                                                                                                                                                                                                                                                                                                                                             |
| Article Type:                 | Protocol                                                                                                                                                                                                                                                                                                                                                                                                                                                                                                                                                                                                                                                                                                                                                                                                                                                                        |
| Date Submitted by the Author: | 12-Jun-2020                                                                                                                                                                                                                                                                                                                                                                                                                                                                                                                                                                                                                                                                                                                                                                                                                                                                     |
| Complete List of Authors:     | Jacobs, Jamie; Massachusetts General Hospital Department of Psychiatry; Harvard Medical School Department of Psychiatry<br>Rapoport, Chelsea; Massachusetts General Hospital Department of Psychiatry<br>Horenstein, Arielle; Massachusetts General Hospital Department of Psychiatry; Temple University Department of Psychology<br>Clay, Madison; Massachusetts General Hospital Department of Psychiatry<br>Walsh, Emily; Massachusetts General Hospital Department of Psychiatry; University of Miami Department of Psychology, Psychology<br>Peppercorn, Jeffrey; Massachusetts General Hospital; Harvard Medical School, Medicine<br>Temel, Jennifer; Massachusetts General Hospital Cancer Center, Medicine; Harvard Medical School, Medicine<br>Greer, Joseph; Massachusetts General Hospital Department of Psychiatry; Harvard Medical School Department of Psychiatry |
| Keywords:                     | Breast tumours < ONCOLOGY, MENTAL HEALTH, Adult psychiatry < PSYCHIATRY, SOCIAL MEDICINE                                                                                                                                                                                                                                                                                                                                                                                                                                                                                                                                                                                                                                                                                                                                                                                        |
|                               |                                                                                                                                                                                                                                                                                                                                                                                                                                                                                                                                                                                                                                                                                                                                                                                                                                                                                 |

SCHOLARONE™  
Manuscripts

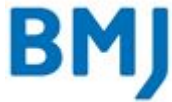

I, the Submitting Author has the right to grant and does grant on behalf of all authors of the Work (as defined in the below author licence), an exclusive licence and/or a non-exclusive licence for contributions from authors who are: i) UK Crown employees; ii) where BMJ has agreed a CC-BY licence shall apply, and/or iii) in accordance with the terms applicable for US Federal Government officers or employees acting as part of their official duties; on a worldwide, perpetual, irrevocable, royalty-free basis to BMJ Publishing Group Ltd ("BMJ") its licensees and where the relevant Journal is co-owned by BMJ to the co-owners of the Journal, to publish the Work in this journal and any other BMJ products and to exploit all rights, as set out in our [licence](#).

The Submitting Author accepts and understands that any supply made under these terms is made by BMJ to the Submitting Author unless you are acting as an employee on behalf of your employer or a postgraduate student of an affiliated institution which is paying any applicable article publishing charge ("APC") for Open Access articles. Where the Submitting Author wishes to make the Work available on an Open Access basis (and intends to pay the relevant APC), the terms of reuse of such Open Access shall be governed by a Creative Commons licence – details of these licences and which [Creative Commons](#) licence will apply to this Work are set out in our licence referred to above.

Other than as permitted in any relevant BMJ Author's Self Archiving Policies, I confirm this Work has not been accepted for publication elsewhere, is not being considered for publication elsewhere and does not duplicate material already published. I confirm all authors consent to publication of this Work and authorise the granting of this licence.

1  
2  
3 Study Protocol for a Randomized Controlled Feasibility Trial of a Virtual Intervention (STRIDE)  
4 for Symptom Management, Distress, and Adherence to Adjuvant Endocrine Therapy after Breast  
5 Cancer  
6  
7

8 Jamie M. Jacobs, PhD<sup>1,2</sup>, Chelsea S. Rapoport, BA<sup>1</sup>, Arielle Horenstein, MA<sup>1</sup>, Madison Clay<sup>1</sup>,  
9 Emily A. Walsh, BA<sup>1,3</sup>, Jeffrey Peppercorn, MD, MPH<sup>4,5</sup>, Jennifer S. Temel, MD<sup>4,5</sup>, Joseph A.  
10 Greer, PhD<sup>1,2</sup>  
11  
12

13 <sup>1</sup>Massachusetts General Hospital, Department of Psychiatry, 55 Fruit Street, Boston, MA, 02114  
14 USA

15 <sup>2</sup>Harvard Medical School, Department of Psychiatry, 25 Shattuck Street, Boston, MA, 02115  
16 USA

17 <sup>3</sup>University of Miami, Department of Psychology, 5665 Ponce De Leon Boulevard, Coral  
18 Gables, FL, 33146, USA

19 <sup>4</sup>Massachusetts General Hospital, Department of Medicine, 55 Fruit Street, Boston, MA, 02114  
20 USA

21 <sup>5</sup>Harvard Medical School, Department of Medicine, 25 Shattuck Street, Boston, MA, 02115  
22 USA  
23  
24

25  
26 **Corresponding Author:**

27 Jamie Jacobs, PhD

28 55 Fruit Street

29 Yawkey, Suite 10B

30 Massachusetts General Hospital

31 Boston, MA 02114

32 [jjacobs@mgh.harvard.edu](mailto:jjacobs@mgh.harvard.edu)  
33  
34

35 **Funding Statement:** This work was supported by a Career Development Award from the  
36 National Cancer Institute of the National Institutes of Health (K07CA211107; Jacobs).  
37

38 **Author Contributions:** All authors contributed to the study conception and design. The protocol  
39 was developed by all authors and written by JJ, EW, and CR. The first draft of the manuscript  
40 was written by JJ, CR, and AH, and all authors commented on previous versions of the  
41 manuscript. All authors read and approved the final manuscript.  
42  
43

44 **Competing Interests Statement:** JJ is a paid consultant from Blue Note Therapeutics. JG  
45 receives royalties from Springer Humana Press, has research funding from Gaido Health/BCG  
46 Digital Ventures, and is a paid consultant from Concerto HealthAI and Blue Note Therapeutics.  
47 JP has received research funding from Pfizer, is a paid consultant for Athenex, and JP's spouse is  
48 an employee of GlaxoSmithKline. All other authors declare that they have no conflicts of  
49 interest.  
50

51 **Acknowledgments:** We thank the study patients for their time and dedication to this research  
52 study.  
53  
54  
55  
56  
57  
58  
59  
60

**Data Availability Statement:** There are no data in this work. Upon study completion, data are available upon reasonable request.

**Word Count:** 3,644

## ABSTRACT

**Introduction:** Patient adherence to adjuvant endocrine therapy (AET) after a diagnosis of hormone-sensitive breast cancer is poor. Previous interventions have failed to produce changes in adherence, address patient preferences, or include theoretically informed and evidence-based components. Therefore, we iteratively developed a patient-centered, evidence-based, small-group, videoconference intervention to improve adherence and symptom management as well as reduce distress for patients taking AET after breast cancer (STRIDE).

**Methods and Analysis:** The current study is a non-blinded, randomized, controlled, feasibility trial of STRIDE compared to a medication monitoring control group. The primary objective is to examine the feasibility and acceptability of STRIDE, while secondary objectives are to assess changes in objective and subjective adherence, symptom distress, and satisfaction with AET. Patients will be recruited from the Massachusetts General Hospital Cancer Center in Boston, Massachusetts. The total number of patients accrued will be 75, with  $\geq 60$  patients completing the study. All patients will store their AET in an electronic pill bottle for objective adherence monitoring. Patients randomly assigned to the STRIDE intervention will receive six weekly one-hour sessions, in small groups of two, delivered via videoconferencing by a trained mental health professional. Patients assigned to the control group will store their medication in the electronic pill bottle and receive follow-up oncology care as usual. All participants will complete self-report psychosocial measures at baseline, 12 weeks, and 24 weeks post-baseline.

**Ethics and Dissemination:** The study is funded by the National Cancer Institute of the National Institutes of Health and is approved by the Dana-Farber/Harvard Cancer Center Institutional

1  
2  
3 Review Board (Protocol #18-603, version 1.2, first approval date 2/1/2019). The study will be  
4 reported in accordance with the Consolidated Standards of Reporting Trials statement for non-  
5 pharmacological trials. Results will be published in peer-reviewed academic journals, presented  
6 at scientific meetings, and disseminated to patient organizations and media outlets.  
7  
8  
9  
10  
11

12 **Trial Registration Number:** Clinicaltrials.gov: NCT03837496; pre-results.  
13  
14  
15

16  
17 **Keywords:** adjuvant endocrine therapy, hormonal therapy, breast cancer, symptom management,  
18 adherence, distress, cognitive-behavioral intervention  
19  
20  
21  
22  
23  
24  
25  
26  
27  
28  
29  
30  
31  
32  
33  
34  
35  
36  
37  
38  
39  
40  
41  
42  
43  
44  
45  
46  
47  
48  
49  
50  
51  
52  
53  
54  
55  
56  
57  
58  
59  
60

**Strengths and limitations of this study:**

- This study employs a patient-centered, evidence-based, virtual videoconference intervention to improve adherence, enhance symptom management, and reduce distress for patients taking AET after breast cancer.
- Given the lack of efficacious interventions to date, this study design and intervention were informed by in-depth qualitative analysis and iterative intervention development to maximize patient-centeredness, feasibility, acceptability, and efficacy.
- To maximize scalability and dissemination, patients participate virtually for all study procedures including consent, intervention, and assessments; therefore, no hospital or in-person visits are necessary.
- The homogenous sample with respect to sociodemographic diversity will limit generalizability of the findings.

## INTRODUCTION

Up to 75% of female patients diagnosed with early-stage breast cancer will require adjuvant endocrine therapy (AET) to prevent the likelihood of recurrence and improve survival.[1] AET (e.g., tamoxifen or an aromatase inhibitor) reduces recurrence and mortality by approximately 30 to 50%, for hormone receptor-positive breast cancer.[2,3] Despite the substantial, indisputable benefit, half of women are non-adherent (i.e., do not take the medication as prescribed) within five years of initiating AET.[4] In addition to greater risk of breast cancer recurrence[5,6] and breast cancer mortality,[7] non-adherence to AET is associated with higher rates of physician visits, hospitalizations,[8] and poorer patient-provider relationships.[9]

Several factors are known to contribute to suboptimal adherence for patients taking AET,[5,7,10] including substantial side effects (e.g., joint pain, hot flashes, sleep difficulties),[11-13] psychological distress during survivorship,[11] low perceived need for AET,[14] low self-efficacy for taking medication,[8] negative beliefs about AET and related side effects,[15] and low social support.[16] While several of these contributors are modifiable, patients receive virtually no formal support to promote medication-taking after breast cancer. Only four randomized controlled trials (RCTs) to date have investigated psychosocial interventions to promote AET adherence,[17] and they have failed to address the adherence challenges that patients face. Previous studies neglected to include theoretically-driven and empirically-based intervention components to target behavioral drivers of adherence, were not developed using guiding principles of behavioral intervention development,[18,19] have been methodologically flawed, and were not informed by patient preferences.

To address the significant need to optimize AET adherence, improve self-management of side effects, and reduce distress for patients taking AET, we iteratively developed a patient-



1  
2  
3 centered, small-group, evidence-based, videoconference intervention: STRIDE (**S**ymptom-  
4 **T**argeted **R**andomized **I**ntervention for **D**istress and Adherence to Adjuvant **E**ndocrine Therapy).  
5  
6 Intervention development was informed by a comprehensive systematic literature review,[17] a  
7  
8 qualitative in-depth analysis of patient experiences and preferences,[20] prior efficacious  
9  
10 treatments,[21,22] and expert feedback from oncology clinicians and behavioral scientists. We  
11  
12 then modified intervention content and duration, logistics, and study procedures using  
13  
14 quantitative and qualitative feedback from exit interviews with five patients who participated in a  
15  
16 run-in phase of the intervention. Patients were enthusiastic about the STRIDE intervention,  
17  
18 described it as beneficial, preferred the group setting, and noted that the virtual delivery was a  
19  
20 necessary convenience.  
21  
22  
23  
24  
25

26  
27 The current report outlines the details of the RCT that is currently underway comparing  
28  
29 the finalized STRIDE intervention to a medication monitoring control condition. The primary  
30  
31 objective is to establish the feasibility and acceptability of the STRIDE intervention compared to  
32  
33 the medication monitoring control group. The secondary aims are to assess the effects of the  
34  
35 intervention on objective and self-reported AET adherence, symptom distress, and satisfaction  
36  
37 with AET. Finally, we will explore group differences on additional self-reported psychosocial  
38  
39 constructs and examine potential mediators and moderators of any treatment outcomes.  
40  
41  
42  
43

## 44 **METHODS AND ANALYSIS**

### 45 **Study Design**

46  
47 This is a single site, randomized, controlled, pilot feasibility study comparing a  
48  
49 videoconference intervention (STRIDE) to standard care plus medication monitoring in 75  
50  
51 patients taking AET after breast cancer. Recruitment will occur at the Massachusetts General  
52  
53 Hospital (MGH) Boston and three MGH community affiliates: MGH Newton-Wellesley, MGH  
54  
55  
56  
57  
58  
59

1  
2  
3 North Shore, and MGH Waltham. The Consolidated Standards of Reporting Trials (CONSORT)  
4  
5 flow diagram is illustrated in Figure 1. The study is approved by the Dana Farber/Harvard  
6  
7 Cancer Center's (DF/HCC) Institutional Review Board (Clinicaltrials.gov: NCT03837496).  
8  
9

### 10 **Participant selection**

11  
12 To be eligible, patients must be female, be age 21 or older, have a diagnosis of early-  
13  
14 stage (stage 0-IIIb), have hormone receptor-positive breast cancer, have completed primary  
15  
16 treatment (i.e., chemotherapy, surgery, and/or radiation) for breast cancer, be within 1 week – 36  
17  
18 months of starting AET, be able to read and respond in English, and have an Eastern Cooperative  
19  
20 Oncology Group performance status  $\leq 2$  (See Table 1). Patients will complete a 3-item distress  
21  
22 screening using an adapted National Comprehensive Cancer Network (NCCN) Distress  
23  
24 Thermometer (range = 0-10).[23] Those who report distress  $\geq 4$  on any of the three items will be  
25  
26 eligible to participate (i.e., distress related to having to take AET, distress related to  
27  
28 symptoms/side effects, and/or distress related to AET adherence). To ensure engagement and  
29  
30 compliance with study procedures, patients with cognitive impairment, uncontrolled psychosis,  
31  
32 active suicidal ideation, or a psychiatric hospitalization within the past year will not be eligible.  
33  
34 In addition, exclusion criteria include enrollment in a clinical trial for breast cancer (due to  
35  
36 additional medication monitoring), participation in another psychosocial intervention study, or  
37  
38 current engagement in formal group psychotherapy.  
39  
40  
41  
42  
43

### 44 **Study Procedures**

45  
46 Trained study staff will review the electronic health record (EHR) to identify potentially  
47  
48 eligible patients with upcoming appointments at the MGH Center for Breast Cancer or one of the  
49  
50 MGH community affiliates. For those identified patients, study staff will then request permission  
51  
52 from the respective oncology clinicians to approach the patients about study participation. After  
53  
54  
55  
56  
57  
58  
59  
60

1  
2  
3 receiving approval from the oncology clinicians, study staff will approach patients during their  
4 outpatient appointment to explain study procedures and gauge their interest in participating.  
5  
6 Given the heavy volume of patients in the breast clinic on any given day, study staff can also  
7  
8 contact patients by telephone if they are not able to approach them in person. Patients can also  
9  
10 self-refer through advertisements on the online MGH study recruitment site or via posted flyers  
11  
12 in the clinic. Finally, the oncology clinician or nurse practitioner can also directly refer interested  
13  
14 patients.  
15  
16  
17  
18

19 Eligible patients approached in person will complete written informed consent with  
20 trained study staff, and those approached by telephone will complete electronic informed consent  
21 with trained study staff. Enrolled patients will complete a one-week baseline period during which  
22 they will use the Medication Event Monitoring System (MEMS Caps),[24] to electronically  
23 monitor medication-taking, as well as complete baseline self-report study questionnaires.  
24  
25 Following one week of medication monitoring, study staff will randomly allocate patients 1:1 to  
26 either the STRIDE intervention or the medication monitoring control group via a computer-  
27 generated randomization scheme created by the study biostatistician; group allocation will be  
28 concealed for each patient until randomization occurs. Randomization will be stratified  
29 according to level of distress, determined by baseline scores on the Hospital Anxiety and  
30 Depression Scale (HADS),[25] (high distress  $\geq 8$ ; low distress  $<8$ ). Patients will complete the  
31 same self-report measures at 12-week and 24-week follow-ups. Assessments will be conducted  
32 using mailed paper questionnaires or electronically via Research Electronic Data Capture  
33 (REDCap), a HIPAA compliant, web-based survey tool.[26] Given the virtual nature of the  
34 assessments and intervention sessions, patients will not need to travel to the hospital for any  
35 study-related visits and will receive \$20 per assessment for their time and effort.  
36  
37  
38  
39  
40  
41  
42  
43  
44  
45  
46  
47  
48  
49  
50  
51  
52  
53  
54  
55  
56  
57  
58  
59  
60

## STRIDE Intervention

STRIDE is a brief, small group-based, videoconference intervention with six weekly one-hour sessions and two follow-up 15-30-minute telephone check-ins occurring approximately one and two months after the final intervention session. Groups will include two patients, matched according to schedules, and will take place via MGH-approved videoconference software, Zoom Video Communications, Inc (Zoom). The STRIDE intervention incorporates aspects of Cognitive Behavioral Therapy for Adherence and Depression [27] and Cognitive Behavioral Stress Management for Breast Cancer,[21] such as cognitive restructuring, behavioral activation, relaxation training, and skills-based coping strategies to address adherence and mood symptoms. The intervention also includes psychoeducation about the benefits and risks of AET, an assessment of barriers to adherence, and problem solving of individual barriers. Three of the six sessions focus entirely on addressing AET-related side effects and breast cancer treatment-related symptoms, such as hot flashes, pain, and fatigue, through specific behavioral coping strategies, evidence-based symptom management, and problem solving. As part of the intervention, participants will be asked to practice coping skills and relaxation training, using audio recordings, in between sessions.

Trained licensed psychologists, licensed social workers, and psychology doctoral students will administer the intervention and participate in weekly clinical group supervision with the principal investigator (PI). To monitor treatment fidelity, at least 10% of sessions will be randomly selected, stratified by study therapist, and reviewed by an independent assessor for percentage of key intervention topics covered, with a goal of 90% of possible topics covered per session.[28] Feedback will be discussed with the study therapists to maintain and enhance adherence to the intervention manual.

## Medication Monitoring Control

Participants in the control condition will monitor medication-taking with MEMS Caps and otherwise receive follow up oncology care as usual. As medication monitoring can increase adherence in and of itself,[29] both groups will self-monitor medication, and only participants randomly assigned to STRIDE will receive the intervention.

## Outcomes

Table 2 lists the self-report questionnaires and the time points at which they are administered.

### Demographic and Clinical Characteristics

Participants will self-report their age, gender, race, ethnicity, marital status, education level, and relationship status. The following information will be collected from the EHR: MGH clinic site, breast cancer stage, node status, HER2/neu status, treatment type (e.g., surgery, chemotherapy, radiation), time since treatment completion, AET medication type, date of AET initiation, menopausal status, ovarian suppression (yes/no), oophorectomy (yes/no) and number of concomitant medications at study enrollment.

### Primary Outcomes

*Feasibility and Acceptability.* Feasibility will be measured by the rate of enrollment (>50%), participant retention (>70%), and intervention attendance ( $\geq 70\%$  of patients attending at least 4 of 6 sessions). Acceptability will be measured by intervention satisfaction, with >75% of patients reporting average satisfaction greater than the midpoint of the Client Satisfaction Questionnaire (CSQ) at the 12-week assessment.[30]

### Secondary Outcomes

*Adherence to AET.* Objective adherence rates will be recorded using the MEMS Caps,[24] which are widely used in adherence monitoring, including for patients with breast

1  
2  
3 cancer.[31-33] Patients store their medication in the MEMS bottle, which records the date and  
4 time of any openings as a proxy for medication taking. The Supplemental Medication Diary will  
5 be used alongside the MEMS Caps to document any instance in which a patient takes the  
6 medication without opening the MEMS Cap. We will also make note of any physician-  
7 prescribed medication break during the patients' study participation. We will further assess self-  
8 reported adherence using the five-item Medication Adherence Report Scale (MARS-5).[34] The  
9 MARS-5 measures adherence to treatment with five questions concerning forgetting, changing  
10 doses, stopping, skipping, and using less than what is prescribed.

11  
12 *Symptom Distress.* We will assess symptom distress using the Breast Cancer Prevention  
13 Trial Symptom Scale (BCPT),[35] a symptom checklist for which patients document how much  
14 they were bothered by several physical and psychological symptoms associated with AET use,  
15 such as hot flashes, weight gain, night sweats, and joint pain.

16  
17 *Satisfaction with AET.* We will assess satisfaction with AET using the Cancer Therapy  
18 Satisfaction Questionnaire (CTSQ).[36] The CTSQ is a self-report measure that evaluates  
19 patients' beliefs about specific aspects of the medication, such as expectations of the  
20 effectiveness of AET therapy, feelings about side effects, and therapy adherence.

#### 21 Exploratory Outcomes

22  
23 The following measures will be administered to explore group differences on several  
24 psychosocial constructs, as well as possible mediators or moderators of intervention effects:  
25 quality of life measured by the Functional Assessment of Cancer Therapy-Breast Cancer (FACT-  
26 B),[37] medication-taking self-efficacy measured by the Self-Efficacy for Appropriate  
27 Medication Use Scale (SEAMS),[38] distress measured by the Hospital Anxiety and Depression  
28 Scale (HADS), [25] beliefs about AET measured by the Beliefs about Medicines Questionnaire –

1  
2  
3 Adjuvant Endocrine Therapy (BMQ-AET),[39] social support measured by the  
4  
5 Multidimensional Scale of Perceived Social Support (MSPSS),[40] acquired coping skills  
6  
7 measured by the Measure of Current Status –Part A (MOCS),[41] self-efficacy for symptom  
8  
9 management measured by the Self-Efficacy For Managing Symptoms Questionnaire,[42] and  
10  
11 cognitive functioning measured by the Patient-Reported Outcomes Measurement Information  
12  
13 System (PROMIS) – Cognitive Function – Short Form 4a.[43]  
14  
15

### 16 17 **Safety and Adverse Events** 18

19 Study staff will review self-report measures upon completion for missing data and to  
20  
21 monitor distress levels. If a patient endorses a score  $\geq 11$  on the depression subscale of the  
22  
23 HADS, the PI will be notified and either the PI or one of the trained study therapists will contact  
24  
25 the patient via telephone to conduct a risk/safety assessment. If the patient requires further  
26  
27 outpatient services (e.g., pharmacotherapy) or is at risk for self-harm, study staff will make the  
28  
29 necessary referrals for treatment and/or urgent psychiatric care. If suicidality or risk of harm to  
30  
31 others is otherwise discovered at any study visit, the patient will be referred to the appropriate  
32  
33 services.  
34  
35  
36

37 At weekly meetings, the research team will discuss summaries of adverse events by  
38  
39 treatment group, and all serious adverse events will be reported to the PI, the DF/HCC IRB, and  
40  
41 the appropriate federal agencies (e.g., National Cancer Institute) regardless of any judgment of  
42  
43 their relatedness to the study. The research team will also discuss summary reports of treatment  
44  
45 retention and reasons for dropout or withdrawal by treatment group. Patients who withdraw will  
46  
47 be asked if they are willing to complete assessment measures. The project will be stopped  
48  
49 immediately if at any point the DF/HCC IRB or the study investigators judge that the risks of  
50  
51  
52  
53  
54  
55  
56  
57  
58  
59  
60

1  
2  
3 study procedures outweigh the benefits. Furthermore, the DF/HCC IRB will conduct trial  
4  
5 auditing if deemed necessary throughout the study.  
6  
7  
8  
9

## 10 **Data Collection and Management**

11  
12 The study PI will oversee all aspects of data collection and management. All data  
13  
14 management activities will utilize REDCap for electronic collection and management of data.  
15  
16 Data management reports will be generated weekly and discussed during the study team  
17  
18 meetings. Study source documents, including but not limited to signed consent forms, completed  
19  
20 eligibility checklists, and any paper-based self-report questionnaires, will be scanned and stored  
21  
22 digitally as certified copies on a secure drive within the encrypted MGH network accessible only  
23  
24 to trained study staff. Physical source documents will be destroyed once they are scanned and the  
25  
26 corresponding electronic document is confirmed to be viable. If a patient is consented  
27  
28 electronically, their digital consent form will be saved as the original source document.  
29  
30  
31  
32

## 33 **Statistical Analysis**

34  
35 The primary objective of this pilot study is to demonstrate feasibility, defined as (1)  
36  
37 enrollment rate  $>50\%$ , (2) retention rate  $>70\%$ , and (3) intervention attendance rate  $\geq 70\%$  (i.e.  $\geq$   
38  
39  $70\%$  of participants complete at least 4 of 6 sessions). Five patients participated in a trial run-in  
40  
41 phase, and 75 will participate in the RCT. We estimate that the enrollment rate will be  
42  
43 approximately  $60\%$ . If 134 patients are approached and 80 (total) are enrolled, the lower limit for  
44  
45 an exact, one-sided  $95\%$  confidence interval for the estimated enrollment rate will be  $53\%$ .  
46  
47  
48 Furthermore, we anticipate that the retention and attendance rates will both be at least  $80\%$ , and  
49  
50 with 80 enrolled participants, the lower limit for an exact, one-sided  $95\%$  confidence interval for  
51  
52 the retention and attendance rates will be  $71\%$ . Thus, based on our estimates of the feasibility  
53  
54  
55  
56  
57  
58  
59  
60



1  
2  
3 parameters, the study will demonstrate feasibility of the STRIDE intervention with a sample size  
4  
5 of 75 in the RCT and five in the run-in.  
6

7  
8 For the analysis of secondary outcomes of the STRIDE intervention on objective and  
9  
10 subjective adherence to AET, symptom-related distress, and satisfaction with AET, data will be  
11  
12 first be assessed for patterns of missingness [44] and statistical assumptions. We will use the  
13  
14 intention-to-treat principle for analyses with all randomized subjects and maximum likelihood  
15  
16 with multiple imputation to account for missing data. We will then conduct mixed effects models  
17  
18 with repeated measures data for secondary outcomes and relevant demographic and treatment-  
19  
20 related factors as covariates (e.g., age, stage, time since AET initiation). Longitudinal analyses  
21  
22 will include all time points and a cross-sectional analysis for each time point. Given that this  
23  
24 pilot is not powered to detect statistically significant group differences, we will examine mean  
25  
26 differences and sample variability on the secondary outcomes. Effect sizes (Cohen's d) will be  
27  
28 calculated for changes in outcomes from baseline to 12 and 24 weeks, where 0.3 indicates a  
29  
30 small effect, 0.5 a medium effect, and 0.8 a large effect [45]. Effect sizes will be used in a power  
31  
32 analysis to estimate the necessary sample size to conduct a full-scale efficacy trial with power  
33  
34 >80%. We will also verify the needed sample size based on ability to detect a clinically  
35  
36 meaningful difference and references to existing literature.[46] We will use the same statistical  
37  
38 procedures to examine group differences on exploratory outcomes (e.g., QOL, distress). Finally,  
39  
40 we will explore a) possible mediators of the intervention (e.g., coping ability) by examining the  
41  
42 bootstrapped confidence intervals of the indirect effects and b) possible moderators (e.g., social  
43  
44 support) of intervention effects by probing interactions between the moderator and group  
45  
46 assignment that reach or approach significance ( $p < .15$ ) when predicting patient-reported  
47  
48 outcomes.  
49  
50  
51  
52  
53  
54  
55  
56  
57  
58  
59  
60

## LIMITATIONS

Limitations of the current trial deserve mention. First, the study is limited to patients with breast cancer currently receiving care at a Boston area major medical center and its affiliate sites, limiting the generalizability of the results. Second, patients who have access to devices (e.g., smartphones, computers, tablets) with videoconferencing capability are more likely to participate, which may bias the sample to individuals with higher incomes and education. However, videoconference delivery does have the potential to increase accessibility for individuals for whom in-person sessions may be prohibitive due to travel and/or associated costs. Third, although we are using a randomized, controlled design, both the participants and the study therapists are aware of each patient's study group assignment after randomization, as it is not possible to conduct a blinded psychosocial intervention study. Fourth, while we considered an attention-matched condition to control for nonspecific intervention effects, we decided against this approach because medication monitoring is likely to improve adherence alone.[29] Additionally, requesting participation in a placebo intervention adds undue burden to patients who are coping with emotional and physical sequelae. Finally, an attention control should only be employed if attention (from the therapist) would affect the primary outcome. Since no data suggest that therapist attention would improve AET adherence, an attention control would be an added expense and potentially unethical.[29] Finally, while many patients continue to take AET for up to ten years, our assessment follow-ups are limited to approximately six months following enrollment. Future studies may benefit from a longer follow-up period.

### Patient and Public Involvement

Patients were involved in an initial qualitative phase of this study, which informed the overall study design, intervention, and outcomes measures. Briefly, 30 patients enrolled and

1  
2  
3 engaged in semi-structured interviews with trained study staff to understand experiences with  
4 and perceptions of AET, barriers and facilitators to adherence, emotional and symptom-related  
5 distress.[20] Interviews also solicited feedback from patients about their preferences for a  
6 psychosocial intervention, such as whether they preferred videoconference vs. in person,  
7 individual vs. group, and session length, frequency, and duration. Recurrent themes from these  
8 interviews informed intervention content and procedures. In addition, five patients participated in  
9 a run-in trial of the intervention and assessment measures and quantitatively rated the  
10 acceptability, enjoyableness, and feasibility of the intervention while also completing semi-  
11 structured interviews to provide feedback about the intervention, assessments, and study  
12 procedures. The intervention and procedures were modified and refined based on feedback from  
13 these exit interviews. For example, an additional session was added to the intervention for a total  
14 of six sessions in the final intervention, and an outcome measure was added based on feedback  
15 about acceptability of the length of the assessment battery.

## 32 **ETHICS AND DISSEMINATION**

33  
34  
35 The trial is being conducted in compliance with this study protocol, which has been  
36 approved by the DF/HCC's IRB. Written informed consent is and will be obtained from every  
37 participant, either in-person or over the phone; if consented over the phone, participants are and  
38 will be provided with a secure electronic consent form that is digitally signed. All documents,  
39 investigative reports, and information relating to the participants are confidential. Participant  
40 data are de-identified and compliant with the Standards of Privacy of Individually Identifiable  
41 Health Information ("Privacy Rule") of Health Insurance Portability and Accountability Act  
42 (HIPAA). Significant modifications to the study protocol will be submitted to the DF/HCC IRB  
43 for approval and communicated to study participants and all relevant members of the research  
44  
45  
46  
47  
48  
49  
50  
51  
52  
53  
54  
55  
56  
57  
58  
59  
60

1  
2  
3 team. Due to this being a low-risk, social/behavioral intervention, it is unlikely participants will  
4  
5 be at any risk of physical harm because of study participation but they may experience increased  
6  
7 emotional distress as a result of the intervention content. Participants may withdraw from the  
8  
9 study at any time, and participants for whom distress is not adequately resolved will be offered  
10  
11 additional psychological care through the primary site's cancer center. Any results from this  
12  
13 study will be published in peer-reviewed journals and local and national conference proceedings,  
14  
15 and a description of the trial and summary of results will be available on ClinicalTrials.gov. The  
16  
17 investigative team will track the manuscript in accordance with authorship guidelines. Only the  
18  
19 investigative team will have access to the trial dataset, and access will only be permitted upon  
20  
21 reasonable request through a data usage agreement via the IRB. There are no plans for the use of  
22  
23 professional writers. If a patient expresses interest in learning the results of the study, study staff  
24  
25 will provide an abstract of the study results upon completion of data collection.  
26  
27  
28  
29

### 30 **Current Trial Status**

31  
32  
33 Recruitment of participants started on October 11, 2019, and as of March 15, 2020, 25  
34  
35 patients had enrolled. The trial was put on a temporary recruitment pause on March 26, 2020 due  
36  
37 to the COVID-19 pandemic and plans to resume recruitment in June 2020.  
38  
39  
40  
41

## 42 **CONCLUSION**

43  
44 Adherence to AET is suboptimal and associated with poorer outcomes for patients after  
45  
46 treatment for early-stage hormone receptor-positive breast cancer. While barriers to adherence  
47  
48 are modifiable, interventions thus far have failed to produce meaningful improvements in  
49  
50 adherence. The study outlined in this protocol is the first to address adherence, distress, and  
51  
52 symptom management with a theoretically informed and evidence-based psychosocial  
53  
54  
55  
56  
57  
58  
59  
60

1  
2  
3 videoconference intervention that also directly incorporates patients' preferences for intervention  
4 content and delivery. Ultimately, this study will contribute to the understanding of patients'  
5 needs related to AET and provide insights into the feasibility and acceptability of an intervention  
6 designed to improve adherence, symptom management, and distress. Future studies based on  
7 these findings have the potential to influence survivorship care plans, as videoconferencing is a  
8 modality that can be widely disseminated to overcome geographic and cost-related barriers to in-  
9 person care. Improved adherence to AET may prevent recurrence and mortality, extending the  
10 survival for patients after breast cancer on lengthy regimens while also improving their quality of  
11 life.  
12  
13  
14  
15  
16  
17  
18  
19  
20  
21  
22  
23  
24  
25  
26  
27  
28  
29  
30  
31  
32  
33  
34  
35  
36  
37  
38  
39  
40  
41  
42  
43  
44  
45  
46  
47  
48  
49  
50  
51  
52  
53  
54  
55  
56  
57  
58  
59  
60

1  
2  
3  
4  
5  
6  
7  
8  
9  
10  
11  
12  
13  
14  
15  
16  
17  
18  
19  
20  
21  
22  
23  
24  
25  
26  
27  
28  
29  
30  
31  
32  
33  
34  
35  
36  
37  
38  
39  
40  
41  
42  
43  
44  
45  
46  
47  
48  
49  
50  
51  
52  
53  
54  
55  
56  
57  
58  
59  
60

## FIGURES AND TABLES

**Figure 1: CONSORT flow diagram**

For peer review only

**Table 1. Eligibility Criteria**

| <b>Inclusion Criteria</b>                                                                                     |
|---------------------------------------------------------------------------------------------------------------|
| 1. Female                                                                                                     |
| 2. Age 21 or older                                                                                            |
| 3. Diagnosis of early-stage (Stage 0-IIIb), hormone receptor + breast cancer                                  |
| 4. Within 1 week-36 months of starting adjuvant endocrine therapy                                             |
| 5. Ability to read and respond in English                                                                     |
| 6. Eastern Cooperative Oncology Group (ECOG) performance status $\leq 2$                                      |
| 7. Currently taking adjuvant endocrine therapy (i.e. if took recent break, has taken within the past 2 weeks) |
| 8. Completed primary treatment (i.e., chemotherapy, surgery, and/or radiation) for early-stage breast cancer  |
| 9. Indicates a score $\geq 4$ on one of the three NCCN adapted distress thermometer study screening questions |
| <b>Exclusion Criteria</b>                                                                                     |
| 1. Uncontrolled psychosis, active suicidal ideation, or psychiatric hospitalization within the past year      |
| 2. Cognitive impairment that prohibits participation in the study                                             |
| 3. Enrollment in a different clinical trial for breast cancer                                                 |
| 4. Current participation in formal group psychotherapy or other psychosocial intervention trial               |

**Table 2. Study Instruments and Time Points**

| <b>Instrument/Measure:</b>                                                                     | <b>Screening</b> | <b>Baseline (4-week window from consent)</b>   | <b>12-weeks post-baseline (+/- 2-week window)</b> | <b>*24-weeks post-baseline (+/- 2-week window)</b> |
|------------------------------------------------------------------------------------------------|------------------|------------------------------------------------|---------------------------------------------------|----------------------------------------------------|
| Electronic health record review                                                                | X                |                                                |                                                   |                                                    |
| Adapted NCCN Distress Thermometer                                                              | X                |                                                |                                                   |                                                    |
| Medication Event Monitoring System (MEMS Caps)                                                 |                  | To be used throughout the 24-week study period |                                                   |                                                    |
| Demographics                                                                                   |                  | X                                              |                                                   |                                                    |
| Medication Adherence Report Scale (MARS-5)                                                     |                  | X                                              | X                                                 | X                                                  |
| Breast Cancer Prevention Trial Symptom Checklist (BCPT)                                        |                  | X                                              | X                                                 | X                                                  |
| Cancer Therapy Satisfaction Questionnaire (CTSQ)                                               |                  | X                                              | X                                                 | X                                                  |
| Hospital Anxiety and Depression Scale (HADS)                                                   |                  | X                                              | X                                                 | X                                                  |
| Functional Assessment of Cancer Therapy (FACT-B)                                               |                  | X                                              | X                                                 | X                                                  |
| Measure of Current Status (MOCS)                                                               |                  | X                                              | X                                                 | X                                                  |
| Beliefs About Medications Questionnaire – Adjuvant Endocrine Therapy (BMQ-AET)                 |                  | X                                              | X                                                 | X                                                  |
| Multidimensional Scale of Perceived Social Support (MSPSS)                                     |                  | X                                              | X                                                 | X                                                  |
| Self-Efficacy in Appropriate Medication Use Scale (SEAMS)                                      |                  | X                                              | X                                                 | X                                                  |
| Self-Efficacy For Managing Symptoms and Taking AET Questionnaire (Self-Efficacy For Symptoms)  |                  | X                                              | X                                                 | X                                                  |
| Patient-Reported Outcomes Measurement Information System (PROMIS) – Cognitive Function – Short |                  | X                                              | X                                                 | X                                                  |



|                                                                    |                                                                            |  |   |  |
|--------------------------------------------------------------------|----------------------------------------------------------------------------|--|---|--|
| Form 4a                                                            |                                                                            |  |   |  |
| Client Satisfaction Questionnaire (CSQ)*                           |                                                                            |  | X |  |
| Supplemental Medication Diary                                      | To serve as optional as-needed supplement to MEMS Caps (e.g., on vacation) |  |   |  |
| <i>*CSQ will be administered to intervention participants only</i> |                                                                            |  |   |  |

For peer review only

## REFERENCES

1. Burstein HJ, Temin S, Anderson H, et al. Adjuvant endocrine therapy for women with hormone receptor-positive breast cancer: American Society of Clinical Oncology clinical practice guideline focused update. *J Clin Oncol* 2014;**32**(21):2255-69.
2. Davies C, Godwin J, Gray R, et al. Relevance of breast cancer hormone receptors and other factors to the efficacy of adjuvant tamoxifen: patient-level meta-analysis of randomised trials. *Lancet* 2011;**378**(9793):771-84.
3. (EBCTCG) EBCTCG. Aromatase inhibitors versus tamoxifen in early breast cancer: patient-level meta-analysis of the randomised trials. *Lancet* 2015;**386**(10001):1341-52.
4. Chlebowski RT, Kim J, Haque R. Adherence to endocrine therapy in breast cancer adjuvant and prevention settings. *Cancer Prev Res (Phila)* 2014;**7**(4):378-87.
5. Markkula A, Hietala M, Henningson M, et al. Clinical Profiles Predict Early Nonadherence to Adjuvant Endocrine Treatment in a Prospective Breast Cancer Cohort. *Cancer Prevention Research* 2012.
6. Markkula A, Hietala M, Henningson M, et al. Clinical profiles predict early nonadherence to adjuvant endocrine treatment in a prospective breast cancer cohort. *Cancer Prev Res (Phila)* 2012.
7. Yood MU, Owusu C, Buist DS, et al. Mortality impact of less-than-standard therapy in older breast cancer patients. *J Am Coll Surg* 2008;**206**(1):66-75.
8. Lebovits AH, Strain JJ, Schleifer SJ, et al. Patient noncompliance with self-administered chemotherapy. *Cancer* 1990;**65**(1):17-22.
9. Waterhouse DM, Calzone KA, Mele C, et al. Adherence to oral tamoxifen: a comparison of patient self-report, pill counts, and microelectronic monitoring. *J Clin Oncol* 1993;**11**(6):1189-97.
10. Makubate B, Donnan PT, Dewar JA, et al. Cohort study of adherence to adjuvant endocrine therapy, breast cancer recurrence and mortality. *Br J Cancer* 2013;**108**(7):1515-24.
11. Hadji P, Blettner M, Harbeck N, et al. The Patient's Anastrozole Compliance to Therapy (PACT) Program: a randomized, in-practice study on the impact of a standardized information program on persistence and compliance to adjuvant endocrine therapy in postmenopausal women with early breast cancer. *Ann Oncol* 2013;**24**(6):1505-12.
12. Czajkowski SM, Powell LH, Adler N, et al. From ideas to efficacy: The ORBIT model for developing behavioral treatments for chronic diseases. *Health Psychol* 2015;**34**(10):971-82.
13. Yu KD, Zhou Y, Liu GY, et al. A prospective, multicenter, controlled, observational study to evaluate the efficacy of a patient support program in improving patients' persistence to adjuvant aromatase inhibitor medication for postmenopausal, early stage breast cancer. *Breast Cancer Res Treat* 2012;**134**(1):307-13.
14. Davies C, Pan H, Godwin J, et al. Long-term effects of continuing adjuvant tamoxifen to 10 years versus stopping at 5 years after diagnosis of oestrogen receptor-positive breast cancer: ATLAS, a randomised trial. *Lancet* 2013;**381**(9869):805-16.
15. Moon Z, Moss-Morris R, Hunter MS, et al. Barriers and facilitators of adjuvant hormone therapy adherence and persistence in women with breast cancer: a systematic review. *Patient Prefer Adherence* 2017;**11**:305-22.

16. Neven P, Markopoulos C, Tanner M, et al. The impact of educational materials on compliance and persistence rates with adjuvant aromatase inhibitor treatment: first-year results from the compliance of aromatase inhibitors assessment in daily practice through educational approach (CARIATIDE) study. *Breast* 2014;**23**(4):393-9.
17. Greer JA, Amoyal N, Nisotel L, et al. A systematic review of adherence to oral antineoplastic therapies. *Oncologist* 2016;**21**(3):354-76.
18. Onken LS, Carroll KM, Shoham V, et al. Reenvisioning Clinical Science: Unifying the Discipline to Improve the Public Health. *Clin Psychol Sci* 2014;**2**(1):22-34.
19. Rounsaville BJ, Carroll KM, Onken LS. A Stage Model of Behavioral Therapies Research: Getting Started and Moving on From Stage I. *Clinical Psychology: Science and Practice* 2001;**8**(2):133-42.
20. Jacobs JM, Walsh EA, Park ER, et al. The Patient's Voice: Adherence, Symptoms, and Distress Related to Adjuvant Endocrine Therapy After Breast Cancer. *Int J Behav Med* 2020.
21. Antoni MH, Smith R. *Stress Management Intervention for Women with Breast Cancer: Participant's Workbook*. Washington, DC: American Psychological Association, 2003.
22. Safren SA, Hendriksen ES, Mayer KH, et al. Cognitive-Behavioral Therapy for HIV Medication Adherence and Depression. *Cognitive and Behavioral Practice* 2004;**11**(4):415-24.
23. Dabrowski M, Boucher K, Ward JH, et al. Clinical experience with the NCCN distress thermometer in breast cancer patients. *Journal of the National Comprehensive Cancer Network* 2007;**5**(1):104-11.
24. Farmer KC. Methods for measuring and monitoring medication regimen adherence in clinical trials and clinical practice. *Clin Ther* 1999;**21**(6):1074-90; discussion 73.
25. Zigmond AS, Snaith RP. The hospital anxiety and depression scale. *Acta Psychiatr Scand* 1983;**67**(6):361-70.
26. Harris PA, Taylor R, Thielke R, et al. Research electronic data capture (REDCap)--a metadata-driven methodology and workflow process for providing translational research informatics support. *J Biomed Inform* 2009;**42**(2):377-81.
27. Safren SA, Soroudi N, Gonzalez JS. *Coping with chronic illness : a cognitive-behavioral therapy approach for adherence and depression workbook*. New York: Oxford University Press, 2007.
28. Wickersham K, Colbert A, Caruthers D, et al. Assessing fidelity to an intervention in a randomized controlled trial to improve medication adherence. *Nurs Res* 2011;**60**(4):264-9.
29. Pagoto SL, McDermott MM, Reed G, et al. Can attention control conditions have detrimental effects on behavioral medicine randomized trials? *Psychosom Med* 2013;**75**(2):137-43.
30. Attkisson CC, Zwick R. The Client Satisfaction Questionnaire: Psychometric properties and correlations with service utilization and psychotherapy outcome. *Evaluation and program planning* 1982;**5**(3):233-37.
31. DiMatteo MR, Lepper HS, Croghan TW. Depression is a risk factor for noncompliance with medical treatment: meta-analysis of the effects of anxiety and depression on patient adherence. *Arch Intern Med* 2000;**160**(14):2101-7.
32. Thivat E, Van Praagh I, Belliere A, et al. Adherence with oral oncologic treatment in cancer patients: interest of an adherence score of all dosing errors. *Oncology* 2013;**84**(2):67-74.

- 1
- 2
- 3
- 4 33. Partridge AH, Archer L, Kornblith AB, et al. Adherence and persistence with oral adjuvant
- 5 chemotherapy in older women with early-stage breast cancer in CALGB 49907:
- 6 adherence companion study 60104. *J Clin Oncol* 2010;**28**(14):2418-22.
- 7
- 8 34. Horne R, Weinman J. Self-regulation and self-management in asthma: exploring the role of
- 9 illness perceptions and treatment beliefs in explaining non-adherence to preventer
- 10 medication. *Psychology and Health* 2002;**17**(1):17-32.
- 11
- 12 35. Cella D, Land SR, Chang CH, et al. Symptom measurement in the Breast Cancer Prevention
- 13 Trial (BCPT) (P-1): psychometric properties of a new measure of symptoms for midlife
- 14 women. *Breast Cancer Res Treat* 2008;**109**(3):515-26.
- 15
- 16 36. Abetz L, Coombs JH, Keininger DL, et al. Development of the cancer therapy satisfaction
- 17 questionnaire: item generation and content validity testing. *Value Health* 2005;**8 Suppl**
- 18 **1**:S41-53.
- 19
- 20 37. Brady MJ, Cella DF, Mo F, et al. Reliability and validity of the Functional Assessment of
- 21 Cancer Therapy-Breast quality-of-life instrument. *Journal of clinical oncology*
- 22 1997;**15**(3):974-86.
- 23
- 24 38. Risser J, Jacobson TA, Kripalani S. Development and psychometric evaluation of the Self-
- 25 efficacy for Appropriate Medication Use Scale (SEAMS) in low-literacy patients with
- 26 chronic disease. *J Nurs Meas* 2007;**15**(3):203-19.
- 27
- 28 39. Brett J, Hulbert-Williams NJ, Fenlon D, et al. Psychometric properties of the Beliefs about
- 29 Medicine Questionnaire-adjuvant endocrine therapy (BMQ-AET) for women taking
- 30 AETs following early-stage breast cancer. *Health Psychol Open*
- 31 2017;**4**(2):2055102917740469.
- 32
- 33 40. Zimet GD, Dahlem NW, Zimet SG, et al. The multidimensional scale of perceived social
- 34 support. *Journal of personality assessment* 1988;**52**(1):30-41.
- 35
- 36 41. Antoni MH, Lechner SC, Kazi A, et al. How stress management improves quality of life after
- 37 treatment for breast cancer. *J Consult Clin Psychol* 2006;**74**(6):1143-52.
- 38
- 39 42. Shelby RA, Edmond SN, Wren AA, et al. Self-efficacy for coping with symptoms moderates
- 40 the relationship between physical symptoms and well-being in breast cancer survivors
- 41 taking adjuvant endocrine therapy. *Support Care Cancer* 2014;**22**(10):2851-9.
- 42
- 43 43. Lai JS, Wagner LI, Jacobsen PB, et al. Self-reported cognitive concerns and abilities: two
- 44 sides of one coin? *Psychooncology* 2014;**23**(10):1133-41.
- 45
- 46 44. Little RJ, D'Agostino R, Cohen ML, et al. The prevention and treatment of missing data in
- 47 clinical trials. *N Engl J Med* 2012;**367**(14):1355-60.
- 48
- 49 45. Cohen J. A power primer. *Psychol Bull* 1992;**112**(1):155-9.
- 50
- 51 46. Kraemer HC, Mintz J, Noda A, et al. Caution regarding the use of pilot studies to guide
- 52 power calculations for study proposals. *Arch Gen Psychiatry* 2006;**63**(5):484-9.
- 53
- 54
- 55
- 56
- 57
- 58
- 59
- 60

1  
2  
3  
4  
5  
6  
7  
8  
9  
10  
11  
12  
13  
14  
15  
16  
17  
18  
19  
20  
21  
22  
23  
24  
25  
26  
27  
28  
29  
30  
31  
32  
33  
34  
35  
36  
37  
38  
39  
40  
41  
42  
43  
44  
45  
46  
47  
48  
49  
50  
51  
52  
53  
54  
55  
56  
57  
58  
59  
60

**Figure 1: CONSORT flow diagram**

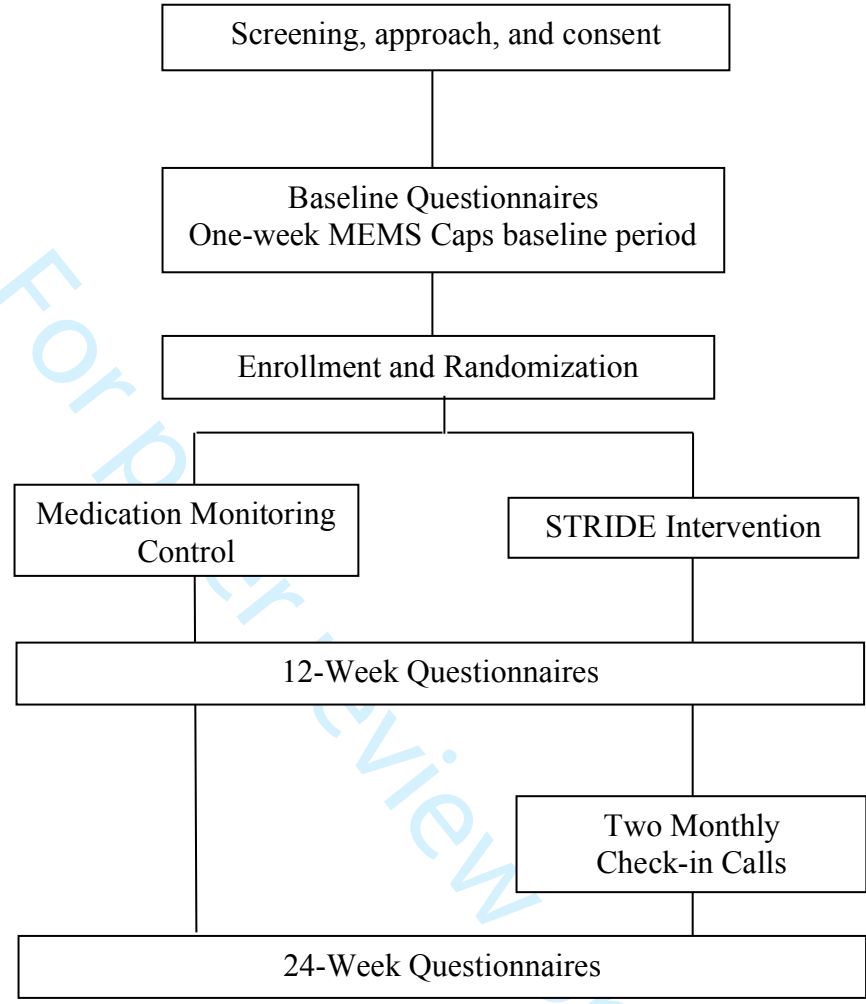

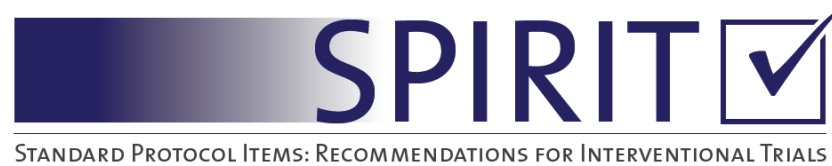

SPIRIT 2013 Checklist: Recommended items to address in a clinical trial protocol and related documents\*

| Section/item                      | Item No | Description                                                                                                                                                                                                                                                                              | Addressed on page number |
|-----------------------------------|---------|------------------------------------------------------------------------------------------------------------------------------------------------------------------------------------------------------------------------------------------------------------------------------------------|--------------------------|
| <b>Administrative information</b> |         |                                                                                                                                                                                                                                                                                          |                          |
| Title                             | 1       | Descriptive title identifying the study design, population, interventions, and, if applicable, trial acronym                                                                                                                                                                             | _____1_____              |
| Trial registration                | 2a      | Trial identifier and registry name. If not yet registered, name of intended registry                                                                                                                                                                                                     | _____3_____              |
|                                   | 2b      | All items from the World Health Organization Trial Registration Data Set                                                                                                                                                                                                                 | _____n/a_____            |
| Protocol version                  | 3       | Date and version identifier                                                                                                                                                                                                                                                              | _____2_____              |
| Funding                           | 4       | Sources and types of financial, material, and other support                                                                                                                                                                                                                              | _____1_____              |
| Roles and responsibilities        | 5a      | Names, affiliations, and roles of protocol contributors                                                                                                                                                                                                                                  | _____1_____              |
|                                   | 5b      | Name and contact information for the trial sponsor                                                                                                                                                                                                                                       | _____n/a_____            |
|                                   | 5c      | Role of study sponsor and funders, if any, in study design; collection, management, analysis, and interpretation of data; writing of the report; and the decision to submit the report for publication, including whether they will have ultimate authority over any of these activities | _____n/a_____            |
|                                   | 5d      | Composition, roles, and responsibilities of the coordinating centre, steering committee, endpoint adjudication committee, data management team, and other individuals or groups overseeing the trial, if applicable (see Item 21a for data monitoring committee)                         | _____n/a_____            |

|    |                                                           |     |                                                                                                               |                           |
|----|-----------------------------------------------------------|-----|---------------------------------------------------------------------------------------------------------------|---------------------------|
| 1  | <b>Introduction</b>                                       |     |                                                                                                               |                           |
| 2  |                                                           |     |                                                                                                               |                           |
| 3  | Background and                                            | 6a  | Description of research question and justification for undertaking the trial, including summary of relevant   | _____5-6_____             |
| 4  | rationale                                                 |     | studies (published and unpublished) examining benefits and harms for each intervention                        |                           |
| 5  |                                                           |     |                                                                                                               |                           |
| 6  |                                                           | 6b  | Explanation for choice of comparators                                                                         | _____10_____              |
| 7  |                                                           |     |                                                                                                               |                           |
| 8  | Objectives                                                | 7   | Specific objectives or hypotheses                                                                             | _____6_____               |
| 9  |                                                           |     |                                                                                                               |                           |
| 10 | Trial design                                              | 8   | Description of trial design including type of trial (eg, parallel group, crossover, factorial, single group), |                           |
| 11 |                                                           |     | allocation ratio, and framework (eg, superiority, equivalence, noninferiority, exploratory)                   | _____6_____               |
| 12 |                                                           |     |                                                                                                               |                           |
| 13 |                                                           |     |                                                                                                               |                           |
| 14 | <b>Methods: Participants, interventions, and outcomes</b> |     |                                                                                                               |                           |
| 15 |                                                           |     |                                                                                                               |                           |
| 16 | Study setting                                             | 9   | Description of study settings (eg, community clinic, academic hospital) and list of countries where data will | _____6-7, 9_____          |
| 17 |                                                           |     | be collected. Reference to where list of study sites can be obtained                                          |                           |
| 18 |                                                           |     |                                                                                                               |                           |
| 19 | Eligibility criteria                                      | 10  | Inclusion and exclusion criteria for participants. If applicable, eligibility criteria for study centres and  | _____7,9,20_____          |
| 20 |                                                           |     | individuals who will perform the interventions (eg, surgeons, psychotherapists)                               |                           |
| 21 |                                                           |     |                                                                                                               |                           |
| 22 | Interventions                                             | 11a | Interventions for each group with sufficient detail to allow replication, including how and when they will be | _____9-10_____            |
| 23 |                                                           |     | administered                                                                                                  |                           |
| 24 |                                                           |     |                                                                                                               |                           |
| 25 |                                                           | 11b | Criteria for discontinuing or modifying allocated interventions for a given trial participant (eg, drug dose  | _____n/a_____             |
| 26 |                                                           |     | change in response to harms, participant request, or improving/worsening disease)                             |                           |
| 27 |                                                           |     |                                                                                                               |                           |
| 28 |                                                           | 11c | Strategies to improve adherence to intervention protocols, and any procedures for monitoring adherence        | _____9-10_____            |
| 29 |                                                           |     | (eg, drug tablet return, laboratory tests)                                                                    |                           |
| 30 |                                                           |     |                                                                                                               |                           |
| 31 |                                                           | 11d | Relevant concomitant care and interventions that are permitted or prohibited during the trial                 | _____7_____               |
| 32 |                                                           |     |                                                                                                               |                           |
| 33 | Outcomes                                                  | 12  | Primary, secondary, and other outcomes, including the specific measurement variable (eg, systolic blood       | _____10-12_____           |
| 34 |                                                           |     | pressure), analysis metric (eg, change from baseline, final value, time to event), method of aggregation (eg, |                           |
| 35 |                                                           |     | median, proportion), and time point for each outcome. Explanation of the clinical relevance of chosen         |                           |
| 36 |                                                           |     | efficacy and harm outcomes is strongly recommended                                                            |                           |
| 37 |                                                           |     |                                                                                                               |                           |
| 38 | Participant timeline                                      | 13  | Time schedule of enrolment, interventions (including any run-ins and washouts), assessments, and visits for   | _____8-10, 19, 21-22_____ |
| 39 |                                                           |     | participants. A schematic diagram is highly recommended (see Figure)                                          |                           |
| 40 |                                                           |     |                                                                                                               |                           |
| 41 |                                                           |     |                                                                                                               |                           |
| 42 |                                                           |     |                                                                                                               |                           |

|   |             |    |                                                                                                                                                                                       |                |
|---|-------------|----|---------------------------------------------------------------------------------------------------------------------------------------------------------------------------------------|----------------|
| 1 | Sample size | 14 | Estimated number of participants needed to achieve study objectives and how it was determined, including clinical and statistical assumptions supporting any sample size calculations | ___6, 13-14___ |
| 2 |             |    |                                                                                                                                                                                       |                |
| 3 |             |    |                                                                                                                                                                                       |                |
| 4 | Recruitment | 15 | Strategies for achieving adequate participant enrolment to reach target sample size                                                                                                   | ___7-8___      |
| 5 |             |    |                                                                                                                                                                                       |                |

### 7 **Methods: Assignment of interventions (for controlled trials)**

#### 8 Allocation:

|    |                    |     |                                                                                                                                                                                                                                                                                                                                                          |           |
|----|--------------------|-----|----------------------------------------------------------------------------------------------------------------------------------------------------------------------------------------------------------------------------------------------------------------------------------------------------------------------------------------------------------|-----------|
| 9  |                    |     |                                                                                                                                                                                                                                                                                                                                                          |           |
| 10 | Sequence           | 16a | Method of generating the allocation sequence (eg, computer-generated random numbers), and list of any factors for stratification. To reduce predictability of a random sequence, details of any planned restriction (eg, blocking) should be provided in a separate document that is unavailable to those who enrol participants or assign interventions | ___8___   |
| 11 | generation         |     |                                                                                                                                                                                                                                                                                                                                                          |           |
| 12 |                    |     |                                                                                                                                                                                                                                                                                                                                                          |           |
| 13 |                    |     |                                                                                                                                                                                                                                                                                                                                                          |           |
| 14 |                    |     |                                                                                                                                                                                                                                                                                                                                                          |           |
| 15 |                    |     |                                                                                                                                                                                                                                                                                                                                                          |           |
| 16 | Allocation         | 16b | Mechanism of implementing the allocation sequence (eg, central telephone; sequentially numbered, opaque, sealed envelopes), describing any steps to conceal the sequence until interventions are assigned                                                                                                                                                | ___8___   |
| 17 | concealment        |     |                                                                                                                                                                                                                                                                                                                                                          |           |
| 18 | mechanism          |     |                                                                                                                                                                                                                                                                                                                                                          |           |
| 19 |                    |     |                                                                                                                                                                                                                                                                                                                                                          |           |
| 20 | Implementation     | 16c | Who will generate the allocation sequence, who will enrol participants, and who will assign participants to interventions                                                                                                                                                                                                                                | ___8___   |
| 21 |                    |     |                                                                                                                                                                                                                                                                                                                                                          |           |
| 22 |                    |     |                                                                                                                                                                                                                                                                                                                                                          |           |
| 23 |                    |     |                                                                                                                                                                                                                                                                                                                                                          |           |
| 24 | Blinding (masking) | 17a | Who will be blinded after assignment to interventions (eg, trial participants, care providers, outcome assessors, data analysts), and how                                                                                                                                                                                                                | ___n/a___ |
| 25 |                    |     |                                                                                                                                                                                                                                                                                                                                                          |           |
| 26 |                    |     |                                                                                                                                                                                                                                                                                                                                                          |           |
| 27 |                    | 17b | If blinded, circumstances under which unblinding is permissible, and procedure for revealing a participant's allocated intervention during the trial                                                                                                                                                                                                     | ___n/a___ |
| 28 |                    |     |                                                                                                                                                                                                                                                                                                                                                          |           |
| 29 |                    |     |                                                                                                                                                                                                                                                                                                                                                          |           |
| 30 |                    |     |                                                                                                                                                                                                                                                                                                                                                          |           |

### 31 **Methods: Data collection, management, and analysis**

|    |                 |     |                                                                                                                                                                                                                                                                                                                                                                                                              |             |
|----|-----------------|-----|--------------------------------------------------------------------------------------------------------------------------------------------------------------------------------------------------------------------------------------------------------------------------------------------------------------------------------------------------------------------------------------------------------------|-------------|
| 32 |                 |     |                                                                                                                                                                                                                                                                                                                                                                                                              |             |
| 33 | Data collection | 18a | Plans for assessment and collection of outcome, baseline, and other trial data, including any related processes to promote data quality (eg, duplicate measurements, training of assessors) and a description of study instruments (eg, questionnaires, laboratory tests) along with their reliability and validity, if known. Reference to where data collection forms can be found, if not in the protocol | ___10-13___ |
| 34 | methods         |     |                                                                                                                                                                                                                                                                                                                                                                                                              |             |
| 35 |                 |     |                                                                                                                                                                                                                                                                                                                                                                                                              |             |
| 36 |                 |     |                                                                                                                                                                                                                                                                                                                                                                                                              |             |
| 37 |                 |     |                                                                                                                                                                                                                                                                                                                                                                                                              |             |
| 38 |                 | 18b | Plans to promote participant retention and complete follow-up, including list of any outcome data to be collected for participants who discontinue or deviate from intervention protocols                                                                                                                                                                                                                    | ___12-13___ |
| 39 |                 |     |                                                                                                                                                                                                                                                                                                                                                                                                              |             |
| 40 |                 |     |                                                                                                                                                                                                                                                                                                                                                                                                              |             |
| 41 |                 |     |                                                                                                                                                                                                                                                                                                                                                                                                              |             |
| 42 |                 |     |                                                                                                                                                                                                                                                                                                                                                                                                              |             |



|    |                                 |     |                                                                                                                                                                                                                                                                                                                                       |                   |
|----|---------------------------------|-----|---------------------------------------------------------------------------------------------------------------------------------------------------------------------------------------------------------------------------------------------------------------------------------------------------------------------------------------|-------------------|
| 1  | Data management                 | 19  | Plans for data entry, coding, security, and storage, including any related processes to promote data quality (eg, double data entry; range checks for data values). Reference to where details of data management procedures can be found, if not in the protocol                                                                     | _____ 13 _____    |
| 2  |                                 |     |                                                                                                                                                                                                                                                                                                                                       |                   |
| 3  |                                 |     |                                                                                                                                                                                                                                                                                                                                       |                   |
| 4  |                                 |     |                                                                                                                                                                                                                                                                                                                                       |                   |
| 5  | Statistical methods             | 20a | Statistical methods for analysing primary and secondary outcomes. Reference to where other details of the statistical analysis plan can be found, if not in the protocol                                                                                                                                                              | _____ 13-15 _____ |
| 6  |                                 |     |                                                                                                                                                                                                                                                                                                                                       |                   |
| 7  |                                 |     |                                                                                                                                                                                                                                                                                                                                       |                   |
| 8  |                                 | 20b | Methods for any additional analyses (eg, subgroup and adjusted analyses)                                                                                                                                                                                                                                                              | _____ 14-15 _____ |
| 9  |                                 |     |                                                                                                                                                                                                                                                                                                                                       |                   |
| 10 |                                 | 20c | Definition of analysis population relating to protocol non-adherence (eg, as randomised analysis), and any statistical methods to handle missing data (eg, multiple imputation)                                                                                                                                                       | _____ 14 _____    |
| 11 |                                 |     |                                                                                                                                                                                                                                                                                                                                       |                   |
| 12 |                                 |     |                                                                                                                                                                                                                                                                                                                                       |                   |
| 13 |                                 |     |                                                                                                                                                                                                                                                                                                                                       |                   |
| 14 | <b>Methods: Monitoring</b>      |     |                                                                                                                                                                                                                                                                                                                                       |                   |
| 15 |                                 |     |                                                                                                                                                                                                                                                                                                                                       |                   |
| 16 | Data monitoring                 | 21a | Composition of data monitoring committee (DMC); summary of its role and reporting structure; statement of whether it is independent from the sponsor and competing interests; and reference to where further details about its charter can be found, if not in the protocol. Alternatively, an explanation of why a DMC is not needed | _____ n/a _____   |
| 17 |                                 |     |                                                                                                                                                                                                                                                                                                                                       |                   |
| 18 |                                 |     |                                                                                                                                                                                                                                                                                                                                       |                   |
| 19 |                                 |     |                                                                                                                                                                                                                                                                                                                                       |                   |
| 20 |                                 |     |                                                                                                                                                                                                                                                                                                                                       |                   |
| 21 |                                 |     |                                                                                                                                                                                                                                                                                                                                       |                   |
| 22 |                                 | 21b | Description of any interim analyses and stopping guidelines, including who will have access to these interim results and make the final decision to terminate the trial                                                                                                                                                               | _____ 12-13 _____ |
| 23 |                                 |     |                                                                                                                                                                                                                                                                                                                                       |                   |
| 24 |                                 |     |                                                                                                                                                                                                                                                                                                                                       |                   |
| 25 | Harms                           | 22  | Plans for collecting, assessing, reporting, and managing solicited and spontaneously reported adverse events and other unintended effects of trial interventions or trial conduct                                                                                                                                                     | _____ 12-13 _____ |
| 26 |                                 |     |                                                                                                                                                                                                                                                                                                                                       |                   |
| 27 |                                 |     |                                                                                                                                                                                                                                                                                                                                       |                   |
| 28 | Auditing                        | 23  | Frequency and procedures for auditing trial conduct, if any, and whether the process will be independent from investigators and the sponsor                                                                                                                                                                                           | _____ 13 _____    |
| 29 |                                 |     |                                                                                                                                                                                                                                                                                                                                       |                   |
| 30 |                                 |     |                                                                                                                                                                                                                                                                                                                                       |                   |
| 31 |                                 |     |                                                                                                                                                                                                                                                                                                                                       |                   |
| 32 | <b>Ethics and dissemination</b> |     |                                                                                                                                                                                                                                                                                                                                       |                   |
| 33 |                                 |     |                                                                                                                                                                                                                                                                                                                                       |                   |
| 34 | Research ethics approval        | 24  | Plans for seeking research ethics committee/institutional review board (REC/IRB) approval                                                                                                                                                                                                                                             | _____ 16 _____    |
| 35 |                                 |     |                                                                                                                                                                                                                                                                                                                                       |                   |
| 36 |                                 |     |                                                                                                                                                                                                                                                                                                                                       |                   |
| 37 | Protocol amendments             | 25  | Plans for communicating important protocol modifications (eg, changes to eligibility criteria, outcomes, analyses) to relevant parties (eg, investigators, REC/IRBs, trial participants, trial registries, journals, regulators)                                                                                                      | _____ 17 _____    |
| 38 |                                 |     |                                                                                                                                                                                                                                                                                                                                       |                   |
| 39 |                                 |     |                                                                                                                                                                                                                                                                                                                                       |                   |
| 40 |                                 |     |                                                                                                                                                                                                                                                                                                                                       |                   |
| 41 |                                 |     |                                                                                                                                                                                                                                                                                                                                       |                   |
| 42 |                                 |     |                                                                                                                                                                                                                                                                                                                                       |                   |

|    |                               |     |                                                                                                                                                                                                                                                                                     |                      |
|----|-------------------------------|-----|-------------------------------------------------------------------------------------------------------------------------------------------------------------------------------------------------------------------------------------------------------------------------------------|----------------------|
| 1  | Consent or assent             | 26a | Who will obtain informed consent or assent from potential trial participants or authorised surrogates, and how (see Item 32)                                                                                                                                                        | ___ 8,16 ___         |
| 2  |                               |     |                                                                                                                                                                                                                                                                                     |                      |
| 3  |                               |     |                                                                                                                                                                                                                                                                                     |                      |
| 4  |                               | 26b | Additional consent provisions for collection and use of participant data and biological specimens in ancillary studies, if applicable                                                                                                                                               | ___ 16 ___           |
| 5  |                               |     |                                                                                                                                                                                                                                                                                     |                      |
| 6  |                               |     |                                                                                                                                                                                                                                                                                     |                      |
| 7  | Confidentiality               | 27  | How personal information about potential and enrolled participants will be collected, shared, and maintained in order to protect confidentiality before, during, and after the trial                                                                                                | ___ 13, 16-17 ___    |
| 8  |                               |     |                                                                                                                                                                                                                                                                                     |                      |
| 9  |                               |     |                                                                                                                                                                                                                                                                                     |                      |
| 10 | Declaration of interests      | 28  | Financial and other competing interests for principal investigators for the overall trial and each study site                                                                                                                                                                       | ___ 1 ___            |
| 11 |                               |     |                                                                                                                                                                                                                                                                                     |                      |
| 12 |                               |     |                                                                                                                                                                                                                                                                                     |                      |
| 13 | Access to data                | 29  | Statement of who will have access to the final trial dataset, and disclosure of contractual agreements that limit such access for investigators                                                                                                                                     | ___ 17 ___           |
| 14 |                               |     |                                                                                                                                                                                                                                                                                     |                      |
| 15 |                               |     |                                                                                                                                                                                                                                                                                     |                      |
| 16 |                               |     |                                                                                                                                                                                                                                                                                     |                      |
| 17 | Ancillary and post-trial care | 30  | Provisions, if any, for ancillary and post-trial care, and for compensation to those who suffer harm from trial participation                                                                                                                                                       | ___ 12,17 ___        |
| 18 |                               |     |                                                                                                                                                                                                                                                                                     |                      |
| 19 |                               |     |                                                                                                                                                                                                                                                                                     |                      |
| 20 | Dissemination policy          | 31a | Plans for investigators and sponsor to communicate trial results to participants, healthcare professionals, the public, and other relevant groups (eg, via publication, reporting in results databases, or other data sharing arrangements), including any publication restrictions | ___ 17 ___           |
| 21 |                               |     |                                                                                                                                                                                                                                                                                     |                      |
| 22 |                               |     |                                                                                                                                                                                                                                                                                     |                      |
| 23 |                               |     |                                                                                                                                                                                                                                                                                     |                      |
| 24 |                               | 31b | Authorship eligibility guidelines and any intended use of professional writers                                                                                                                                                                                                      | ___ 17 ___           |
| 25 |                               |     |                                                                                                                                                                                                                                                                                     |                      |
| 26 |                               | 31c | Plans, if any, for granting public access to the full protocol, participant-level dataset, and statistical code                                                                                                                                                                     | ___ 17 ___           |
| 27 |                               |     |                                                                                                                                                                                                                                                                                     |                      |
| 28 |                               |     |                                                                                                                                                                                                                                                                                     |                      |
| 29 | <b>Appendices</b>             |     |                                                                                                                                                                                                                                                                                     |                      |
| 30 |                               |     |                                                                                                                                                                                                                                                                                     |                      |
| 31 | Informed consent materials    | 32  | Model consent form and other related documentation given to participants and authorised surrogates                                                                                                                                                                                  | ___ Not included ___ |
| 32 |                               |     |                                                                                                                                                                                                                                                                                     |                      |
| 33 |                               |     |                                                                                                                                                                                                                                                                                     |                      |
| 34 | Biological specimens          | 33  | Plans for collection, laboratory evaluation, and storage of biological specimens for genetic or molecular analysis in the current trial and for future use in ancillary studies, if applicable                                                                                      | ___ n/a ___          |
| 35 |                               |     |                                                                                                                                                                                                                                                                                     |                      |
| 36 |                               |     |                                                                                                                                                                                                                                                                                     |                      |

\*It is strongly recommended that this checklist be read in conjunction with the SPIRIT 2013 Explanation & Elaboration for important clarification on the items. Amendments to the protocol should be tracked and dated. The SPIRIT checklist is copyrighted by the SPIRIT Group under the Creative Commons [“Attribution-NonCommercial-NoDerivs 3.0 Unported”](https://creativecommons.org/licenses/by-nc-nd/3.0/) license.

# BMJ Open

## Study Protocol for a Randomized Controlled Feasibility Trial of a Virtual Intervention (STRIDE) for Symptom Management, Distress, and Adherence to Adjuvant Endocrine Therapy after Breast Cancer

|                                 |                                                                                                                                                                                                                                                                                                                                                                                                                                                                                                                                                                                                                                                                                                                                                                                                                                                                                 |
|---------------------------------|---------------------------------------------------------------------------------------------------------------------------------------------------------------------------------------------------------------------------------------------------------------------------------------------------------------------------------------------------------------------------------------------------------------------------------------------------------------------------------------------------------------------------------------------------------------------------------------------------------------------------------------------------------------------------------------------------------------------------------------------------------------------------------------------------------------------------------------------------------------------------------|
| Journal:                        | <i>BMJ Open</i>                                                                                                                                                                                                                                                                                                                                                                                                                                                                                                                                                                                                                                                                                                                                                                                                                                                                 |
| Manuscript ID                   | bmjopen-2020-041626.R1                                                                                                                                                                                                                                                                                                                                                                                                                                                                                                                                                                                                                                                                                                                                                                                                                                                          |
| Article Type:                   | Protocol                                                                                                                                                                                                                                                                                                                                                                                                                                                                                                                                                                                                                                                                                                                                                                                                                                                                        |
| Date Submitted by the Author:   | 01-Dec-2020                                                                                                                                                                                                                                                                                                                                                                                                                                                                                                                                                                                                                                                                                                                                                                                                                                                                     |
| Complete List of Authors:       | Jacobs, Jamie; Massachusetts General Hospital Department of Psychiatry; Harvard Medical School Department of Psychiatry<br>Rapoport, Chelsea; Massachusetts General Hospital Department of Psychiatry<br>Horenstein, Arielle; Massachusetts General Hospital Department of Psychiatry; Temple University Department of Psychology<br>Clay, Madison; Massachusetts General Hospital Department of Psychiatry<br>Walsh, Emily; Massachusetts General Hospital Department of Psychiatry; University of Miami Department of Psychology, Psychology<br>Peppercorn, Jeffrey; Massachusetts General Hospital; Harvard Medical School, Medicine<br>Temel, Jennifer; Massachusetts General Hospital Cancer Center, Medicine; Harvard Medical School, Medicine<br>Greer, Joseph; Massachusetts General Hospital Department of Psychiatry; Harvard Medical School Department of Psychiatry |
| <b>Primary Subject Heading</b>: | Oncology                                                                                                                                                                                                                                                                                                                                                                                                                                                                                                                                                                                                                                                                                                                                                                                                                                                                        |
| Secondary Subject Heading:      | Mental health                                                                                                                                                                                                                                                                                                                                                                                                                                                                                                                                                                                                                                                                                                                                                                                                                                                                   |
| Keywords:                       | Breast tumours < ONCOLOGY, MENTAL HEALTH, Adult psychiatry < PSYCHIATRY, SOCIAL MEDICINE                                                                                                                                                                                                                                                                                                                                                                                                                                                                                                                                                                                                                                                                                                                                                                                        |
|                                 |                                                                                                                                                                                                                                                                                                                                                                                                                                                                                                                                                                                                                                                                                                                                                                                                                                                                                 |

SCHOLARONE™  
Manuscripts



I, the Submitting Author has the right to grant and does grant on behalf of all authors of the Work (as defined in the below author licence), an exclusive licence and/or a non-exclusive licence for contributions from authors who are: i) UK Crown employees; ii) where BMJ has agreed a CC-BY licence shall apply, and/or iii) in accordance with the terms applicable for US Federal Government officers or employees acting as part of their official duties; on a worldwide, perpetual, irrevocable, royalty-free basis to BMJ Publishing Group Ltd ("BMJ") its licensees and where the relevant Journal is co-owned by BMJ to the co-owners of the Journal, to publish the Work in this journal and any other BMJ products and to exploit all rights, as set out in our [licence](#).

The Submitting Author accepts and understands that any supply made under these terms is made by BMJ to the Submitting Author unless you are acting as an employee on behalf of your employer or a postgraduate student of an affiliated institution which is paying any applicable article publishing charge ("APC") for Open Access articles. Where the Submitting Author wishes to make the Work available on an Open Access basis (and intends to pay the relevant APC), the terms of reuse of such Open Access shall be governed by a Creative Commons licence – details of these licences and which [Creative Commons](#) licence will apply to this Work are set out in our licence referred to above.

Other than as permitted in any relevant BMJ Author's Self Archiving Policies, I confirm this Work has not been accepted for publication elsewhere, is not being considered for publication elsewhere and does not duplicate material already published. I confirm all authors consent to publication of this Work and authorise the granting of this licence.

1  
2  
3 Study Protocol for a Randomized Controlled Feasibility Trial of a Virtual Intervention (STRIDE)  
4 for Symptom Management, Distress, and Adherence to Adjuvant Endocrine Therapy after Breast  
5 Cancer  
6  
7

8 Jamie M. Jacobs, PhD<sup>1,2</sup>, Chelsea S. Rapoport, BA<sup>1</sup>, Arielle Horenstein, MA<sup>1</sup>, Madison Clay<sup>1</sup>,  
9 Emily A. Walsh, BA<sup>1,3</sup>, Jeffrey Peppercorn, MD, MPH<sup>4,5</sup>, Jennifer S. Temel, MD<sup>4,5</sup>, Joseph A.  
10 Greer, PhD<sup>1,2</sup>  
11  
12

13 <sup>1</sup>Massachusetts General Hospital, Department of Psychiatry, 55 Fruit Street, Boston, MA, 02114  
14 USA

15 <sup>2</sup>Harvard Medical School, Department of Psychiatry, 25 Shattuck Street, Boston, MA, 02115  
16 USA

17 <sup>3</sup>University of Miami, Department of Psychology, 5665 Ponce De Leon Boulevard, Coral  
18 Gables, FL, 33146, USA

19 <sup>4</sup>Massachusetts General Hospital, Department of Medicine, 55 Fruit Street, Boston, MA, 02114  
20 USA

21 <sup>5</sup>Harvard Medical School, Department of Medicine, 25 Shattuck Street, Boston, MA, 02115  
22 USA  
23  
24

25  
26 **Corresponding Author:**

27 Jamie Jacobs, PhD

28 55 Fruit Street

29 Yawkey, Suite 10B

30 Massachusetts General Hospital

31 Boston, MA 02114

32 [jjacobs@mgh.harvard.edu](mailto:jjacobs@mgh.harvard.edu)  
33  
34

35 **Funding Statement:** This work was supported by a Career Development Award from the  
36 National Cancer Institute of the National Institutes of Health (K07CA211107; Jacobs).  
37

38 **Author Contributions:** JJ, CR, AH, MC, EW, JP, JT, and JG contributed to the study  
39 conception and design. The protocol was developed by JJ, CR, AH, MC, EW, JP, JT, and JG,  
40 and written by JJ, EW, and CR. The first draft of the manuscript was written by JJ, CR, and AH,  
41 and JJ, CR, AH, MC, EW, JP, JT, and JG commented on previous versions of the manuscript. JJ,  
42 CR, AH, MC, EW, JP, JT, and JG read and approved the final manuscript.  
43  
44

45 **Competing Interests Statement:** JJ is a paid consultant from Blue Note Therapeutics. JG  
46 receives royalties from Springer Humana Press, has research funding from Gaido Health/BCG  
47 Digital Ventures, and is a paid consultant from Concerto HealthAI and Blue Note Therapeutics.  
48 JP has received research funding from Pfizer, is a paid consultant for Athenex, and JP's spouse is  
49 an employee of GlaxoSmithKline. All other authors declare that they have no conflicts of  
50 interest.  
51  
52

53 **Acknowledgments:** We thank the study patients for their time and dedication to this research  
54 study.  
55  
56  
57  
58  
59  
60

**Data Availability Statement:** There are no data in this work. Upon study completion, data are available upon reasonable request.

**Word Count:** 3,644

## ABSTRACT

**Introduction:** Patient adherence to adjuvant endocrine therapy (AET) after a diagnosis of hormone-sensitive breast cancer is poor. Previous interventions have failed to produce changes in adherence, address patient preferences, or include theoretically informed and evidence-based components. Therefore, we iteratively developed a patient-centered, evidence-based, small-group, videoconference intervention to improve adherence and symptom management as well as reduce distress for patients taking AET after breast cancer (STRIDE).

**Methods and Analysis:** The current study is a non-blinded, randomized, controlled, feasibility trial of STRIDE compared to a medication monitoring control group. The primary objective is to examine the feasibility and acceptability of STRIDE, while secondary objectives are to assess changes in objective and subjective adherence, symptom distress, and satisfaction with AET. Patients will be recruited from the Massachusetts General Hospital Cancer Center in Boston, Massachusetts. The total number of patients accrued will be 75, with  $\geq 60$  patients completing the study. All patients will store their AET in an electronic pill bottle for objective adherence monitoring. Patients randomly assigned to the STRIDE intervention will receive six weekly one-hour sessions, in small groups of two, delivered via videoconferencing by a trained mental health professional. Patients assigned to the control group will store their medication in the electronic pill bottle and receive follow-up oncology care as usual. All participants will complete self-report psychosocial measures at baseline, 12 weeks, and 24 weeks post-baseline.

**Ethics and Dissemination:** The study is funded by the National Cancer Institute of the National Institutes of Health and is approved by the Dana-Farber/Harvard Cancer Center Institutional

1  
2  
3 Review Board (Protocol #18-603, version 1.2, first approval date 2/1/2019). The study will be  
4 reported in accordance with the Consolidated Standards of Reporting Trials statement for non-  
5 pharmacological trials. Results will be published in peer-reviewed academic journals, presented  
6 at scientific meetings, and disseminated to patient organizations and media outlets.  
7  
8  
9  
10  
11

12 **Trial Registration Number:** Clinicaltrials.gov: NCT03837496; pre-results.  
13  
14  
15

16  
17 **Keywords:** adjuvant endocrine therapy, hormonal therapy, breast cancer, symptom management,  
18 adherence, distress, cognitive-behavioral intervention  
19  
20  
21  
22  
23  
24  
25  
26  
27  
28  
29  
30  
31  
32  
33  
34  
35  
36  
37  
38  
39  
40  
41  
42  
43  
44  
45  
46  
47  
48  
49  
50  
51  
52  
53  
54  
55  
56  
57  
58  
59  
60

**Strengths and limitations of this study:**

- This study employs a patient-centered, evidence-based, virtual videoconference intervention to improve adherence, enhance symptom management, and reduce distress for patients taking AET after breast cancer.
- Given the lack of efficacious interventions to date, this study design and intervention were informed by in-depth qualitative analysis and iterative intervention development to maximize patient-centeredness, feasibility, acceptability, and efficacy.
- To maximize scalability and dissemination, patients participate virtually for all study procedures including consent, intervention, and assessments; therefore, no hospital or in-person visits are necessary.
- The homogenous sample with respect to sociodemographic diversity will limit generalizability of the findings.



## INTRODUCTION

Up to 75% of female patients diagnosed with early-stage breast cancer will require adjuvant endocrine therapy (AET) to prevent the likelihood of recurrence and improve survival.[1] AET (e.g., tamoxifen or an aromatase inhibitor) reduces recurrence and mortality by approximately 30 to 50%, for hormone receptor-positive breast cancer.[2,3] Despite the substantial, indisputable benefit, half of women are non-adherent (i.e., do not take the medication as prescribed) within five years of initiating AET.[4] In addition to greater risk of breast cancer recurrence[5,6] and breast cancer mortality,[7] non-adherence to AET is associated with higher rates of physician visits, hospitalizations,[8] and poorer patient-provider relationships.[9]

Several factors are known to contribute to suboptimal adherence for patients taking AET,[5,7,10] including substantial side effects (e.g., joint pain, hot flashes, sleep difficulties),[11-13] psychological distress during survivorship,[11] low perceived need for AET,[14] low self-efficacy for taking medication,[15] negative beliefs about AET and related side effects,[16] and low social support.[17] While several of these contributors are modifiable, patients receive virtually no formal support to promote medication-taking after breast cancer. Only four randomized controlled trials (RCTs) to date have investigated psychosocial interventions to promote AET adherence,[18] and they have failed to address the adherence challenges that patients face. Previous studies neglected to include theoretically-driven and empirically-based intervention components to target behavioral drivers of adherence, were not developed using guiding principles of behavioral intervention development,[19,20] have been methodologically flawed, and were not informed by patient preferences.

To address the significant need to optimize AET adherence, improve self-management of side effects, and reduce distress for patients taking AET, we iteratively developed a patient-

1  
2  
3 centered, small-group, evidence-based, videoconference intervention: STRIDE (**S**ymptom-  
4 **T**argeted **R**andomized **I**ntervention for **D**istress and Adherence to Adjuvant **E**ndocrine Therapy).  
5  
6 Intervention development was informed by a comprehensive systematic literature review,[18] a  
7  
8 qualitative in-depth analysis of patient experiences and preferences,[21] prior efficacious  
9  
10 treatments,[22,23] and expert feedback from oncology clinicians and behavioral scientists. We  
11  
12 then modified intervention content and duration, logistics, and study procedures using  
13  
14 quantitative and qualitative feedback from exit interviews with five patients who participated in a  
15  
16 run-in phase of the intervention. Patients were enthusiastic about the STRIDE intervention,  
17  
18 described it as beneficial, preferred the group setting, and noted that the virtual delivery was a  
19  
20 necessary convenience.  
21  
22  
23  
24  
25

26  
27 The current report outlines the details of the RCT that is currently underway comparing  
28  
29 the finalized STRIDE intervention to a medication monitoring control condition. The primary  
30  
31 objective is to establish the feasibility and acceptability of the STRIDE intervention compared to  
32  
33 the medication monitoring control group. The secondary aims are to assess the effects of the  
34  
35 intervention on objective and self-reported AET adherence, symptom distress, and satisfaction  
36  
37 with AET. Finally, we will explore group differences on additional self-reported psychosocial  
38  
39 constructs and examine potential mediators and moderators of any treatment outcomes. This  
40  
41 pilot study will ultimately inform a future full-scale trial which will examine intervention  
42  
43 efficacy.  
44  
45  
46  
47

## 48 **METHODS AND ANALYSIS**

### 49 **Study Design**

50  
51 This is a single site, randomized, controlled, pilot feasibility study comparing a  
52  
53 videoconference intervention (STRIDE) to standard care plus medication monitoring in 75  
54  
55  
56  
57  
58  
59  
60

1  
2  
3 patients taking AET after breast cancer. Recruitment will occur at the Massachusetts General  
4 Hospital (MGH) Boston and three MGH community affiliates: MGH Newton-Wellesley, MGH  
5 North Shore, and MGH Waltham. The Consolidated Standards of Reporting Trials (CONSORT)  
6 flow diagram is illustrated in Figure 1. The study is approved by the Dana Farber/Harvard  
7 Cancer Center's (DF/HCC) Institutional Review Board (Clinicaltrials.gov: NCT03837496).

### 14 **Participant selection**

15  
16 To be eligible, patients must be female, be age 21 or older, have a diagnosis of early-  
17 stage (stage 0-IIIb), have hormone receptor-positive breast cancer, have completed primary  
18 treatment (i.e., chemotherapy, surgery, and/or radiation) for breast cancer, be within 1 week – 36  
19 months of starting AET, be able to read and respond in English, and have an Eastern Cooperative  
20 Oncology Group performance status  $\leq 2$  (See Table 1). Patients will complete a 3-item distress  
21 screening using an adapted National Comprehensive Cancer Network (NCCN) Distress  
22 Thermometer (range = 0-10).[24] Those who report distress  $\geq 4$  on any of the three items will be  
23 eligible to participate (i.e., distress related to having to take AET, distress related to  
24 symptoms/side effects, and/or distress related to AET adherence). To ensure engagement and  
25 compliance with study procedures, patients with cognitive impairment, uncontrolled psychosis,  
26 active suicidal ideation, or a psychiatric hospitalization within the past year will not be eligible.  
27 In addition, exclusion criteria include enrollment in a clinical trial for breast cancer (due to  
28 additional medication monitoring), participation in another psychosocial intervention study, or  
29 current engagement in formal group psychotherapy.

30  
31  
32  
33  
34  
35  
36  
37  
38  
39  
40  
41  
42  
43  
44  
45  
46  
47  
48  
49  
50  
51  
52  
53  
54  
55  
56  
57  
58  
59  
60  
Five patients participated in a trial run-in phase, and 75 will participate in the RCT. We  
estimate that the enrollment rate will be approximately 60%. If 134 patients are approached and  
80 (total) are enrolled, the lower limit for an exact, one-sided 95% confidence interval for the

1  
2  
3 estimated enrollment rate will be 53%. Furthermore, we anticipate that the retention and  
4  
5 attendance rates will both be at least 80%, and with 80 enrolled participants, the lower limit for  
6  
7 an exact, one-sided 95% confidence interval for the retention and attendance rates will be 71%.  
8  
9  
10 Thus, based on our estimates of the feasibility parameters, the study will demonstrate feasibility  
11  
12 of the STRIDE intervention with a sample size of 75 in the RCT and five in the run-in.  
13  
14  
15

## 16 17 **Study Procedures**

### 18 19 **Recruitment**

20  
21 Trained study staff will review the electronic health record (EHR) to identify potentially eligible  
22  
23 patients with upcoming appointments at the MGH Center for Breast Cancer or one of the MGH  
24  
25 community affiliates. For those identified patients, study staff will then request permission from  
26  
27 the respective oncology clinicians to approach the patients about study participation. After  
28  
29 receiving approval from the oncology clinicians, study staff will approach patients during their  
30  
31 outpatient appointment to explain study procedures and gauge their interest in participating.  
32  
33 Given the heavy volume of patients in the breast clinic on any given day, study staff can also  
34  
35 contact patients by telephone if they are not able to approach them in person. Patients can also  
36  
37 self-refer through advertisements on the online MGH study recruitment site or via posted flyers  
38  
39 in the clinic. Finally, the oncology clinician or nurse practitioner can also directly refer interested  
40  
41 patients.  
42  
43  
44  
45

### 46 47 **Enrollment and Randomization**

48  
49 Eligible patients approached in person will complete written informed consent with trained study  
50  
51 staff, and those approached by telephone will complete electronic informed consent with trained  
52  
53 study staff. Enrolled patients will complete a one-week baseline period during which they will  
54  
55  
56  
57  
58  
59  
60

1  
2  
3 use the Medication Event Monitoring System (MEMS Caps),[25] to electronically monitor  
4 medication-taking, as well as complete baseline self-report study questionnaires. Following one  
5 week of medication monitoring, study staff will randomly allocate patients 1:1 to either the  
6 STRIDE intervention or the medication monitoring control group via a computer-generated  
7 randomization scheme created by the study biostatistician; group allocation will be concealed for  
8 each patient until randomization occurs. Randomization will be stratified according to level of  
9 distress, determined by baseline scores on the Hospital Anxiety and Depression Scale  
10 (HADS),[26] (high distress  $\geq 8$ ; low distress  $<8$ ).

### 21 Assessments

22 Patients will complete the same self-report measures at 12-week and 24-week follow-ups.

23 Assessments will be conducted using mailed paper questionnaires or electronically via Research  
24 Electronic Data Capture (REDCap), a HIPAA compliant, web-based survey tool.[27] Given the  
25 virtual nature of the assessments and intervention sessions, patients will not need to travel to the  
26 hospital for any study-related visits and will receive \$20 per assessment for their time and effort.

### 35 STRIDE Intervention

36  
37 STRIDE is a brief, small group-based, videoconference intervention with six weekly one-  
38 hour sessions and two follow-up 15-30-minute telephone check-ins occurring approximately one  
39 and two months after the final intervention session. Groups will include two patients, matched  
40 according to schedules, and will take place via MGH-approved videoconference software, Zoom  
41 Video Communications, Inc (Zoom). The STRIDE intervention incorporates aspects of  
42 Cognitive Behavioral Therapy for Adherence and Depression [28] and Cognitive Behavioral  
43 Stress Management for Breast Cancer,[22] such as cognitive restructuring, behavioral activation,  
44 relaxation training, and skills-based coping strategies to address adherence and mood symptoms.

1  
2  
3 The intervention also includes psychoeducation about the benefits and risks of AET, an  
4 assessment of barriers to adherence, and problem solving of individual barriers. Three of the six  
5 sessions focus entirely on addressing AET-related side effects and breast cancer treatment-  
6 related symptoms, such as hot flashes, pain, and fatigue, through specific behavioral coping  
7 strategies, evidence-based symptom management, and problem solving. As part of the  
8 intervention, participants will be asked to practice coping skills and relaxation training, using  
9 audio recordings, in between sessions.  
10  
11  
12  
13  
14  
15  
16  
17  
18

### 19 Patient and Public Involvement

20  
21 Patients were involved in an initial qualitative phase of this study, which informed the  
22 overall study design, intervention, and outcomes measures. Briefly, 30 patients enrolled and  
23 engaged in semi-structured interviews with trained study staff to understand experiences with  
24 and perceptions of AET, barriers and facilitators to adherence, emotional and symptom-related  
25 distress.[21] Interviews also solicited feedback from patients about their preferences for a  
26 psychosocial intervention, such as whether they preferred videoconference vs. in person,  
27 individual vs. group, and session length, frequency, and duration. Recurrent themes from these  
28 interviews informed intervention content and procedures. In addition, five patients participated in  
29 a run-in trial of the intervention and assessment measures and quantitatively rated the  
30 acceptability, enjoyableness, and feasibility of the intervention while also completing semi-  
31 structured interviews to provide feedback about the intervention, assessments, and study  
32 procedures. The intervention and procedures were modified and refined based on feedback from  
33 these exit interviews. For example, an additional session was added to the intervention for a total  
34 of six sessions in the final intervention, and an outcome measure was added based on feedback  
35 about acceptability of the length of the assessment battery.  
36  
37  
38  
39  
40  
41  
42  
43  
44  
45  
46  
47  
48  
49  
50  
51  
52  
53  
54  
55  
56  
57  
58  
59  
60

## Intervention Delivery

Trained licensed psychologists, licensed social workers, and psychology doctoral students will administer the intervention and participate in weekly clinical group supervision with the principal investigator (PI). To monitor treatment fidelity, at least 10% of sessions will be randomly selected, stratified by study therapist, and reviewed by an independent assessor for percentage of key intervention topics covered, with a goal of 90% of possible topics covered per session.[29] Feedback will be discussed with the study therapists to maintain and enhance adherence to the intervention manual.

## Medication Monitoring Control

Participants in the control condition will monitor medication-taking with MEMS Caps and otherwise receive follow up oncology care as usual. As medication monitoring can increase adherence in and of itself,[30] both groups will self-monitor medication, and only participants randomly assigned to STRIDE will receive the intervention.

## Outcomes

Table 2 lists the self-report questionnaires and the time points at which they are administered.

## Demographic and Clinical Characteristics

Participants will self-report their age, gender, race, ethnicity, marital status, education level, and relationship status. The following information will be collected from the EHR: MGH clinic site, breast cancer stage, node status, HER2/neu status, treatment type (e.g., surgery, chemotherapy, radiation), time since treatment completion, AET medication type, date of AET initiation, menopausal status, ovarian suppression (yes/no), oophorectomy (yes/no) and number of concomitant medications at study enrollment.

## Primary Outcomes

1  
2  
3           *Feasibility and Acceptability.* Feasibility will be measured by the rate of enrollment  
4 (>50%), participant retention (>70%), and intervention attendance ( $\geq$ 70% of patients attending at  
5 least 4 of 6 sessions). Acceptability will be measured by intervention satisfaction, with >75% of  
6 patients reporting average satisfaction greater than the midpoint of the Client Satisfaction  
7 Questionnaire (CSQ) at the 12-week assessment.[31]  
8  
9

#### 14 Secondary Outcomes

15  
16           *Adherence to AET.* Objective adherence rates will be recorded using the MEMS  
17 Caps,[25] which are widely used in adherence monitoring, including for patients with breast  
18 cancer.[32-34] Patients store their medication in the MEMS bottle, which records the date and  
19 time of any openings as a proxy for medication taking. The Supplemental Medication Diary will  
20 be used alongside the MEMS Caps to document any instance in which a patient takes the  
21 medication without opening the MEMS Cap. We will also make note of any physician-  
22 prescribed medication break during the patients' study participation. We will further assess self-  
23 reported adherence using the five-item Medication Adherence Report Scale (MARS-5).[35] The  
24 MARS-5 measures adherence to treatment with five questions concerning forgetting, changing  
25 doses, stopping, skipping, and using less than what is prescribed.  
26  
27

28           *Symptom Distress.* We will assess symptom distress using the Breast Cancer Prevention  
29 Trial Symptom Scale (BCPT),[36] a symptom checklist for which patients document how much  
30 they were bothered by several physical and psychological symptoms associated with AET use,  
31 such as hot flashes, weight gain, night sweats, and joint pain.  
32  
33

34           *Satisfaction with AET.* We will assess satisfaction with AET using the Cancer Therapy  
35 Satisfaction Questionnaire (CTSQ).[37] The CTSQ is a self-report measure that evaluates  
36  
37  
38  
39



1  
2  
3 patients' beliefs about specific aspects of the medication, such as expectations of the  
4  
5 effectiveness of AET therapy, feelings about side effects, and therapy adherence.  
6

### 7 Exploratory Outcomes

8  
9  
10 The following measures will be administered to explore group differences on several  
11  
12 psychosocial constructs, as well as possible mediators or moderators of intervention effects:  
13  
14 quality of life measured by the Functional Assessment of Cancer Therapy-Breast Cancer (FACT-  
15  
16 B),[38] medication-taking self-efficacy measured by the Self-Efficacy for Appropriate  
17  
18 Medication Use Scale (SEAMS),[39] distress measured by the Hospital Anxiety and Depression  
19  
20 Scale (HADS), [26] beliefs about AET measured by the Beliefs about Medicines Questionnaire –  
21  
22 Adjuvant Endocrine Therapy (BMQ-AET),[40] social support measured by the  
23  
24 Multidimensional Scale of Perceived Social Support (MSPSS),[41] acquired coping skills  
25  
26 measured by the Measure of Current Status –Part A (MOCS),[42] self-efficacy for symptom  
27  
28 management measured by the Self-Efficacy For Managing Symptoms Questionnaire,[43] and  
29  
30 cognitive functioning measured by the Patient-Reported Outcomes Measurement Information  
31  
32 System (PROMIS) – Cognitive Function – Short Form 4a.[44]  
33  
34  
35  
36

### 37 **Safety and Adverse Events**

38  
39  
40 Study staff will review self-report measures upon completion for missing data and to  
41  
42 monitor distress levels. If a patient endorses a score  $\geq 11$  on the depression subscale of the  
43  
44 HADS, the PI will be notified and either the PI or one of the trained study therapists will contact  
45  
46 the patient via telephone to conduct a risk/safety assessment. If the patient requires further  
47  
48 outpatient services (e.g., pharmacotherapy) or is at risk for self-harm, study staff will make the  
49  
50 necessary referrals for treatment and/or urgent psychiatric care. If suicidality or risk of harm to  
51  
52  
53  
54  
55  
56  
57  
58  
59  
60

1  
2  
3 others is otherwise discovered at any study visit, the patient will be referred to the appropriate  
4  
5 services.  
6

7  
8 At weekly meetings, the research team will discuss summaries of adverse events by  
9  
10 treatment group, and all serious adverse events will be reported to the PI, the DF/HCC IRB, and  
11  
12 the appropriate federal agencies (e.g., National Cancer Institute) regardless of any judgment of  
13  
14 their relatedness to the study. The research team will also discuss summary reports of treatment  
15  
16 retention and reasons for dropout or withdrawal by treatment group. Patients who withdraw will  
17  
18 be asked if they are willing to complete assessment measures. The project will be stopped  
19  
20 immediately if at any point the DF/HCC IRB or the study investigators judge that the risks of  
21  
22 study procedures outweigh the benefits. Furthermore, the DF/HCC IRB will conduct trial  
23  
24 auditing if deemed necessary throughout the study.  
25  
26  
27  
28  
29

### 30 31 **Data Collection and Management**

32  
33 The study PI will oversee all aspects of data collection and management. All data  
34  
35 management activities will utilize REDCap for electronic collection and management of data.  
36  
37 Data management reports will be generated weekly and discussed during the study team  
38  
39 meetings. Study source documents, including but not limited to signed consent forms, completed  
40  
41 eligibility checklists, and any paper-based self-report questionnaires, will be scanned and stored  
42  
43 digitally as certified copies on a secure drive within the encrypted MGH network accessible only  
44  
45 to trained study staff. Physical source documents will be destroyed once they are scanned and the  
46  
47 corresponding electronic document is confirmed to be viable. If a patient is consented  
48  
49 electronically, their digital consent form will be saved as the original source document.  
50  
51  
52

### 53 54 **Statistical Analysis**

1  
2  
3 The primary objective of this pilot study is to demonstrate feasibility, defined as (1)  
4 enrollment rate >50%, (2) retention rate >70%, and (3) intervention attendance rate  $\geq$ 70% (i.e.  $\geq$   
5 70% of participants complete at least 4 of 6 sessions).  
6  
7

8  
9  
10 For the analysis of secondary outcomes of the STRIDE intervention on objective and  
11 subjective adherence to AET, symptom-related distress, and satisfaction with AET, data will be  
12 first be assessed for patterns of missingness [45] and statistical assumptions. We will use the  
13 intention-to-treat principle for analyses with all randomized subjects and maximum likelihood  
14 with multiple imputation to account for missing data. We will then conduct mixed effects models  
15 with repeated measures data for secondary outcomes and relevant demographic and treatment-  
16 related factors as covariates (e.g., age, stage, time since AET initiation). Longitudinal analyses  
17 will include all time points and a cross-sectional analysis for each time point. Given that this  
18 pilot is not powered to detect statistically significant group differences, we will examine mean  
19 differences and sample variability on the secondary outcomes. Effect sizes (Cohen's d) will be  
20 calculated for changes in outcomes from baseline to 12 and 24 weeks, where 0.3 indicates a  
21 small effect, 0.5 a medium effect, and 0.8 a large effect [46]. Effect sizes will be used in a power  
22 analysis to estimate the necessary sample size to conduct a full-scale efficacy trial with power  
23 >80%. We will also verify the needed sample size based on ability to detect a clinically  
24 meaningful difference and references to existing literature.[47] We will use the same statistical  
25 procedures to examine group differences on exploratory outcomes (e.g., QOL, distress). Finally,  
26 we will explore a) possible mediators of the intervention (e.g., coping ability) by examining the  
27 bootstrapped confidence intervals of the indirect effects and b) possible moderators (e.g., social  
28 support) of intervention effects by probing interactions between the moderator and group  
29  
30  
31  
32  
33  
34  
35  
36  
37  
38  
39  
40  
41  
42  
43  
44  
45  
46  
47  
48  
49  
50  
51  
52  
53  
54  
55  
56  
57  
58  
59  
60

1  
2  
3 assignment that reach or approach significance ( $p < .15$ ) when predicting patient-reported  
4  
5 outcomes.  
6

## 7 8 **LIMITATIONS**

9  
10 Limitations of the current trial deserve mention. First, the study is limited to patients with  
11 breast cancer currently receiving care at a Boston area major medical center and its affiliate sites,  
12 limiting the generalizability of the results. Second, patients who have access to devices (e.g.,  
13 smartphones, computers, tablets) with videoconferencing capability are more likely to  
14 participate, which may bias the sample to individuals with higher incomes and education.  
15  
16 However, videoconference delivery does have the potential to increase accessibility for  
17 individuals for whom in-person sessions may be prohibitive due to travel and/or associated costs.  
18  
19 Third, although we are using a randomized, controlled design, both the participants and the study  
20 therapists are aware of each patient's study group assignment after randomization, as it is not  
21 possible to conduct a blinded psychosocial intervention study. Fourth, while we considered an  
22 attention-matched condition to control for nonspecific intervention effects, we decided against  
23 this approach because medication monitoring is likely to improve adherence alone.[30]  
24  
25 Additionally, requesting participation in a placebo intervention adds undue burden to patients  
26 who are coping with emotional and physical sequelae. In fact, an attention control should only be  
27 employed if attention (from the therapist) would affect the primary outcome. Since no data  
28 suggest that therapist attention would improve AET adherence, an attention control would be an  
29 added expense and potentially unethical.[30] While many patients continue to take AET for up to  
30 ten years, our assessment follow-ups are limited to approximately six months following  
31 enrollment. Future studies may benefit from a longer follow-up period. Finally, although the  
32 study is underpowered to examine group differences in secondary outcomes, the purpose of  
33  
34  
35  
36  
37  
38  
39  
40  
41  
42  
43  
44  
45  
46  
47  
48  
49  
50  
51  
52  
53  
54  
55  
56  
57  
58  
59  
60

1  
2  
3 including all study questionnaires is to also examine the feasibility of participants completing an  
4 assessment battery of this size. If participants do not complete the surveys, this may indicate an  
5 unacceptable lengthiness that would prohibit data collection and analysis in a future full-scale  
6 efficacy trial. Survey length was directly assessed in the run-in phase of this study.  
7  
8  
9

## 12 **ETHICS AND DISSEMINATION**

14  
15 The trial is being conducted in compliance with this study protocol, which has been  
16 approved by the DF/HCC's IRB. Written informed consent is and will be obtained from every  
17 participant, either in-person or over the phone; if consented over the phone, participants are and  
18 will be provided with a secure electronic consent form that is digitally signed. All documents,  
19  
20  
21  
22  
23  
24  
25  
26  
27  
28  
29  
30  
31  
32  
33  
34  
35  
36  
37  
38  
39  
40  
41  
42  
43  
44  
45  
46  
47  
48  
49  
50  
51  
52  
53  
54  
55  
56  
57  
58  
59  
60

The trial is being conducted in compliance with this study protocol, which has been approved by the DF/HCC's IRB. Written informed consent is and will be obtained from every participant, either in-person or over the phone; if consented over the phone, participants are and will be provided with a secure electronic consent form that is digitally signed. All documents, investigative reports, and information relating to the participants are confidential. Participant data are de-identified and compliant with the Standards of Privacy of Individually Identifiable Health Information ("Privacy Rule") of Health Insurance Portability and Accountability Act (HIPAA). Significant modifications to the study protocol will be submitted to the DF/HCC IRB for approval and communicated to study participants and all relevant members of the research team. Due to this being a low-risk, social/behavioral intervention, it is unlikely participants will be at any risk of physical harm because of study participation but they may experience increased emotional distress as a result of the intervention content. Participants may withdraw from the study at any time, and participants for whom distress is not adequately resolved will be offered additional psychological care through the primary site's cancer center. Any results from this study will be published in peer-reviewed journals and local and national conference proceedings, and a description of the trial and summary of results will be available on ClinicalTrials.gov. The investigative team will track the manuscript in accordance with authorship guidelines. Only the investigative team will have access to the trial dataset, and access will only be permitted upon

1  
2  
3 reasonable request through a data usage agreement via the IRB. There are no plans for the use of  
4  
5 professional writers. If a patient expresses interest in learning the results of the study, study staff  
6  
7 will provide an abstract of the study results upon completion of data collection.  
8  
9

### 10 **Current Trial Status**

11  
12 Recruitment of participants started on October 11, 2019, and as of March 15, 2020, 25  
13  
14 patients had enrolled. The trial was put on a temporary recruitment pause on March 26, 2020 due  
15  
16 to the COVID-19 pandemic and plans to resume recruitment in June 2020.  
17  
18  
19  
20  
21  
22  
23  
24  
25  
26  
27  
28  
29  
30  
31  
32  
33  
34  
35  
36  
37  
38  
39  
40  
41  
42  
43  
44  
45  
46  
47  
48  
49  
50  
51  
52  
53  
54  
55  
56  
57  
58  
59  
60

**FIGURES AND TABLES****Figure 1: CONSORT flow diagram**

For peer review only

**Table 1. Eligibility Criteria**

| <b>Inclusion Criteria</b>                                                                                     |
|---------------------------------------------------------------------------------------------------------------|
| 1. Female                                                                                                     |
| 2. Age 21 or older                                                                                            |
| 3. Diagnosis of early-stage (Stage 0-IIIb), hormone receptor + breast cancer                                  |
| 4. Within 1 week-36 months of starting adjuvant endocrine therapy                                             |
| 5. Ability to read and respond in English                                                                     |
| 6. Eastern Cooperative Oncology Group (ECOG) performance status $\leq 2$                                      |
| 7. Currently taking adjuvant endocrine therapy (i.e. if took recent break, has taken within the past 2 weeks) |
| 8. Completed primary treatment (i.e., chemotherapy, surgery, and/or radiation) for early-stage breast cancer  |
| 9. Indicates a score $\geq 4$ on one of the three NCCN adapted distress thermometer study screening questions |
| <b>Exclusion Criteria</b>                                                                                     |
| 1. Uncontrolled psychosis, active suicidal ideation, or psychiatric hospitalization within the past year      |
| 2. Cognitive impairment that prohibits participation in the study                                             |
| 3. Enrollment in a different clinical trial for breast cancer                                                 |
| 4. Current participation in formal group psychotherapy or other psychosocial intervention trial               |



**Table 2. Study Instruments and Time Points**

| <b>Instrument/Measure:</b>                                                                     | <b>Screening</b> | <b>Baseline (4-week window from consent)</b>   | <b>12-weeks post-baseline (+/- 2-week window)</b> | <b>*24-weeks post-baseline (+/- 2-week window)</b> |
|------------------------------------------------------------------------------------------------|------------------|------------------------------------------------|---------------------------------------------------|----------------------------------------------------|
| Electronic health record review                                                                | X                |                                                |                                                   |                                                    |
| Adapted NCCN Distress Thermometer                                                              | X                |                                                |                                                   |                                                    |
| Medication Event Monitoring System (MEMS Caps)                                                 |                  | To be used throughout the 24-week study period |                                                   |                                                    |
| Demographics                                                                                   |                  | X                                              |                                                   |                                                    |
| Medication Adherence Report Scale (MARS-5)                                                     |                  | X                                              | X                                                 | X                                                  |
| Breast Cancer Prevention Trial Symptom Checklist (BCPT)                                        |                  | X                                              | X                                                 | X                                                  |
| Cancer Therapy Satisfaction Questionnaire (CTSQ)                                               |                  | X                                              | X                                                 | X                                                  |
| Hospital Anxiety and Depression Scale (HADS)                                                   |                  | X                                              | X                                                 | X                                                  |
| Functional Assessment of Cancer Therapy (FACT-B)                                               |                  | X                                              | X                                                 | X                                                  |
| Measure of Current Status (MOCS)                                                               |                  | X                                              | X                                                 | X                                                  |
| Beliefs About Medications Questionnaire – Adjuvant Endocrine Therapy (BMQ-AET)                 |                  | X                                              | X                                                 | X                                                  |
| Multidimensional Scale of Perceived Social Support (MSPSS)                                     |                  | X                                              | X                                                 | X                                                  |
| Self-Efficacy in Appropriate Medication Use Scale (SEAMS)                                      |                  | X                                              | X                                                 | X                                                  |
| Self-Efficacy For Managing Symptoms and Taking AET Questionnaire (Self-Efficacy For Symptoms)  |                  | X                                              | X                                                 | X                                                  |
| Patient-Reported Outcomes Measurement Information System (PROMIS) – Cognitive Function – Short |                  | X                                              | X                                                 | X                                                  |

|                                                                    |                                                                            |  |   |  |
|--------------------------------------------------------------------|----------------------------------------------------------------------------|--|---|--|
| Form 4a                                                            |                                                                            |  |   |  |
| Client Satisfaction Questionnaire (CSQ)*                           |                                                                            |  | X |  |
| Supplemental Medication Diary                                      | To serve as optional as-needed supplement to MEMS Caps (e.g., on vacation) |  |   |  |
| <i>*CSQ will be administered to intervention participants only</i> |                                                                            |  |   |  |

For peer review only

## REFERENCES

1. Burstein HJ, Temin S, Anderson H, et al. Adjuvant endocrine therapy for women with hormone receptor-positive breast cancer: American Society of Clinical Oncology clinical practice guideline focused update. *J Clin Oncol* 2014;**32**(21):2255-69.
2. Davies C, Godwin J, Gray R, et al. Relevance of breast cancer hormone receptors and other factors to the efficacy of adjuvant tamoxifen: patient-level meta-analysis of randomised trials. *Lancet* 2011;**378**(9793):771-84.
3. (EBCTCG) EBCTCG. Aromatase inhibitors versus tamoxifen in early breast cancer: patient-level meta-analysis of the randomised trials. *Lancet* 2015;**386**(10001):1341-52.
4. Chlebowski RT, Kim J, Haque R. Adherence to endocrine therapy in breast cancer adjuvant and prevention settings. *Cancer Prev Res (Phila)* 2014;**7**(4):378-87.
5. Markkula A, Hietala M, Henningson M, et al. Clinical Profiles Predict Early Nonadherence to Adjuvant Endocrine Treatment in a Prospective Breast Cancer Cohort. *Cancer Prevention Research* 2012.
6. Markkula A, Hietala M, Henningson M, et al. Clinical profiles predict early nonadherence to adjuvant endocrine treatment in a prospective breast cancer cohort. *Cancer Prev Res (Phila)* 2012.
7. Yood MU, Owusu C, Buist DS, et al. Mortality impact of less-than-standard therapy in older breast cancer patients. *J Am Coll Surg* 2008;**206**(1):66-75.
8. DiMatteo MR, Giordani PJ, Lepper HS, et al. Patient adherence and medical treatment outcomes: a meta-analysis. *Med Care* 2002;**40**(9):794-811.
9. Waterhouse DM, Calzone KA, Mele C, et al. Adherence to oral tamoxifen: a comparison of patient self-report, pill counts, and microelectronic monitoring. *J Clin Oncol* 1993;**11**(6):1189-97.
10. Makubate B, Donnan PT, Dewar JA, et al. Cohort study of adherence to adjuvant endocrine therapy, breast cancer recurrence and mortality. *Br J Cancer* 2013;**108**(7):1515-24.
11. Hadji P, Blettner M, Harbeck N, et al. The Patient's Anastrozole Compliance to Therapy (PACT) Program: a randomized, in-practice study on the impact of a standardized information program on persistence and compliance to adjuvant endocrine therapy in postmenopausal women with early breast cancer. *Ann Oncol* 2013;**24**(6):1505-12.
12. Czajkowski SM, Powell LH, Adler N, et al. From ideas to efficacy: The ORBIT model for developing behavioral treatments for chronic diseases. *Health Psychol* 2015;**34**(10):971-82.
13. Yu KD, Zhou Y, Liu GY, et al. A prospective, multicenter, controlled, observational study to evaluate the efficacy of a patient support program in improving patients' persistence to adjuvant aromatase inhibitor medication for postmenopausal, early stage breast cancer. *Breast Cancer Res Treat* 2012;**134**(1):307-13.
14. Davies C, Pan H, Godwin J, et al. Long-term effects of continuing adjuvant tamoxifen to 10 years versus stopping at 5 years after diagnosis of oestrogen receptor-positive breast cancer: ATLAS, a randomised trial. *Lancet* 2013;**381**(9869):805-16.
15. Stanton AL, Petrie KJ, Partridge AH. Contributors to nonadherence and nonpersistence with endocrine therapy in breast cancer survivors recruited from an online research registry. *Breast Cancer Res Treat* 2014;**145**(2):525-34.

16. Moon Z, Moss-Morris R, Hunter MS, et al. Barriers and facilitators of adjuvant hormone therapy adherence and persistence in women with breast cancer: a systematic review. *Patient Prefer Adherence* 2017;**11**:305-22.
17. Neven P, Markopoulos C, Tanner M, et al. The impact of educational materials on compliance and persistence rates with adjuvant aromatase inhibitor treatment: first-year results from the compliance of aromatase inhibitors assessment in daily practice through educational approach (CARIATIDE) study. *Breast* 2014;**23**(4):393-9.
18. Greer JA, Amoyal N, Nisotel L, et al. A systematic review of adherence to oral antineoplastic therapies. *Oncologist* 2016;**21**(3):354-76.
19. Onken LS, Carroll KM, Shoham V, et al. Reenvisioning Clinical Science: Unifying the Discipline to Improve the Public Health. *Clin Psychol Sci* 2014;**2**(1):22-34.
20. Rounsaville BJ, Carroll KM, Onken LS. A Stage Model of Behavioral Therapies Research: Getting Started and Moving on From Stage I. *Clinical Psychology: Science and Practice* 2001;**8**(2):133-42.
21. Jacobs JM, Walsh EA, Park ER, et al. The Patient's Voice: Adherence, Symptoms, and Distress Related to Adjuvant Endocrine Therapy After Breast Cancer. *Int J Behav Med* 2020.
22. Antoni MH, Smith R. *Stress Management Intervention for Women with Breast Cancer: Participant's Workbook*. Washington, DC: American Psychological Association, 2003.
23. Safren SA, Hendriksen ES, Mayer KH, et al. Cognitive-Behavioral Therapy for HIV Medication Adherence and Depression. *Cognitive and Behavioral Practice* 2004;**11**(4):415-24.
24. Dabrowski M, Boucher K, Ward JH, et al. Clinical experience with the NCCN distress thermometer in breast cancer patients. *Journal of the National Comprehensive Cancer Network* 2007;**5**(1):104-11.
25. Farmer KC. Methods for measuring and monitoring medication regimen adherence in clinical trials and clinical practice. *Clin Ther* 1999;**21**(6):1074-90; discussion 73.
26. Zigmond AS, Snaith RP. The hospital anxiety and depression scale. *Acta Psychiatr Scand* 1983;**67**(6):361-70.
27. Harris PA, Taylor R, Thielke R, et al. Research electronic data capture (REDCap)--a metadata-driven methodology and workflow process for providing translational research informatics support. *J Biomed Inform* 2009;**42**(2):377-81.
28. Safren SA, Soroudi N, Gonzalez JS. *Coping with chronic illness : a cognitive-behavioral therapy approach for adherence and depression workbook*. New York: Oxford University Press, 2007.
29. Wickersham K, Colbert A, Caruthers D, et al. Assessing fidelity to an intervention in a randomized controlled trial to improve medication adherence. *Nurs Res* 2011;**60**(4):264-9.
30. Pagoto SL, McDermott MM, Reed G, et al. Can attention control conditions have detrimental effects on behavioral medicine randomized trials? *Psychosom Med* 2013;**75**(2):137-43.
31. Attkisson CC, Zwick R. The Client Satisfaction Questionnaire: Psychometric properties and correlations with service utilization and psychotherapy outcome. *Evaluation and program planning* 1982;**5**(3):233-37.
32. DiMatteo MR, Lepper HS, Croghan TW. Depression is a risk factor for noncompliance with medical treatment: meta-analysis of the effects of anxiety and depression on patient adherence. *Arch Intern Med* 2000;**160**(14):2101-7.

- 1
- 2
- 3
- 4 33. Thivat E, Van Praagh I, Belliere A, et al. Adherence with oral oncologic treatment in cancer
- 5 patients: interest of an adherence score of all dosing errors. *Oncology* 2013;**84**(2):67-74.
- 6 34. Partridge AH, Archer L, Kornblith AB, et al. Adherence and persistence with oral adjuvant
- 7 chemotherapy in older women with early-stage breast cancer in CALGB 49907:
- 8 adherence companion study 60104. *J Clin Oncol* 2010;**28**(14):2418-22.
- 9 35. Horne R, Weinman J. Self-regulation and self-management in asthma: exploring the role of
- 10 illness perceptions and treatment beliefs in explaining non-adherence to preventer
- 11 medication. *Psychology and Health* 2002;**17**(1):17-32.
- 12 36. Cella D, Land SR, Chang CH, et al. Symptom measurement in the Breast Cancer Prevention
- 13 Trial (BCPT) (P-1): psychometric properties of a new measure of symptoms for midlife
- 14 women. *Breast Cancer Res Treat* 2008;**109**(3):515-26.
- 15 37. Abetz L, Coombs JH, Keininger DL, et al. Development of the cancer therapy satisfaction
- 16 questionnaire: item generation and content validity testing. *Value Health* 2005;**8 Suppl**
- 17 **1**:S41-53.
- 18 38. Brady MJ, Cella DF, Mo F, et al. Reliability and validity of the Functional Assessment of
- 19 Cancer Therapy-Breast quality-of-life instrument. *Journal of clinical oncology*
- 20 1997;**15**(3):974-86.
- 21 39. Risser J, Jacobson TA, Kripalani S. Development and psychometric evaluation of the Self-
- 22 efficacy for Appropriate Medication Use Scale (SEAMS) in low-literacy patients with
- 23 chronic disease. *J Nurs Meas* 2007;**15**(3):203-19.
- 24 40. Brett J, Hulbert-Williams NJ, Fenlon D, et al. Psychometric properties of the Beliefs about
- 25 Medicine Questionnaire-adjuvant endocrine therapy (BMQ-AET) for women taking
- 26 AETs following early-stage breast cancer. *Health Psychol Open*
- 27 2017;**4**(2):2055102917740469.
- 28 41. Zimet GD, Dahlem NW, Zimet SG, et al. The multidimensional scale of perceived social
- 29 support. *Journal of personality assessment* 1988;**52**(1):30-41.
- 30 42. Antoni MH, Lechner SC, Kazi A, et al. How stress management improves quality of life after
- 31 treatment for breast cancer. *J Consult Clin Psychol* 2006;**74**(6):1143-52.
- 32 43. Shelby RA, Edmond SN, Wren AA, et al. Self-efficacy for coping with symptoms moderates
- 33 the relationship between physical symptoms and well-being in breast cancer survivors
- 34 taking adjuvant endocrine therapy. *Support Care Cancer* 2014;**22**(10):2851-9.
- 35 44. Lai JS, Wagner LI, Jacobsen PB, et al. Self-reported cognitive concerns and abilities: two
- 36 sides of one coin? *Psychooncology* 2014;**23**(10):1133-41.
- 37 45. Little RJ, D'Agostino R, Cohen ML, et al. The prevention and treatment of missing data in
- 38 clinical trials. *N Engl J Med* 2012;**367**(14):1355-60.
- 39 46. Cohen J. A power primer. *Psychol Bull* 1992;**112**(1):155-9.
- 40 47. Kraemer HC, Mintz J, Noda A, et al. Caution regarding the use of pilot studies to guide
- 41 power calculations for study proposals. *Arch Gen Psychiatry* 2006;**63**(5):484-9.
- 42
- 43
- 44
- 45
- 46
- 47
- 48
- 49
- 50
- 51
- 52
- 53
- 54
- 55
- 56
- 57
- 58
- 59
- 60

1  
2  
3  
4  
5  
6  
7  
8  
9  
10  
11  
12  
13  
14  
15  
16  
17  
18  
19  
20  
21  
22  
23  
24  
25  
26  
27  
28  
29  
30  
31  
32  
33  
34  
35  
36  
37  
38  
39  
40  
41  
42  
43  
44  
45  
46  
47  
48  
49  
50  
51  
52  
53  
54  
55  
56  
57  
58  
59  
60

**Figure 1: CONSORT flow diagram**



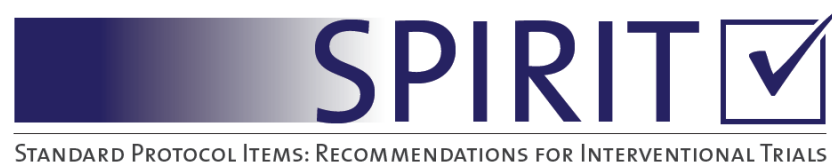

SPIRIT 2013 Checklist: Recommended items to address in a clinical trial protocol and related documents\*

| Section/item                      | Item No | Description                                                                                                                                                                                                                                                                              | Addressed on page number |
|-----------------------------------|---------|------------------------------------------------------------------------------------------------------------------------------------------------------------------------------------------------------------------------------------------------------------------------------------------|--------------------------|
| <b>Administrative information</b> |         |                                                                                                                                                                                                                                                                                          |                          |
| Title                             | 1       | Descriptive title identifying the study design, population, interventions, and, if applicable, trial acronym                                                                                                                                                                             | _____1_____              |
| Trial registration                | 2a      | Trial identifier and registry name. If not yet registered, name of intended registry                                                                                                                                                                                                     | _____3_____              |
|                                   | 2b      | All items from the World Health Organization Trial Registration Data Set                                                                                                                                                                                                                 | _____n/a_____            |
| Protocol version                  | 3       | Date and version identifier                                                                                                                                                                                                                                                              | _____2_____              |
| Funding                           | 4       | Sources and types of financial, material, and other support                                                                                                                                                                                                                              | _____1_____              |
| Roles and responsibilities        | 5a      | Names, affiliations, and roles of protocol contributors                                                                                                                                                                                                                                  | _____1_____              |
|                                   | 5b      | Name and contact information for the trial sponsor                                                                                                                                                                                                                                       | _____n/a_____            |
|                                   | 5c      | Role of study sponsor and funders, if any, in study design; collection, management, analysis, and interpretation of data; writing of the report; and the decision to submit the report for publication, including whether they will have ultimate authority over any of these activities | _____n/a_____            |
|                                   | 5d      | Composition, roles, and responsibilities of the coordinating centre, steering committee, endpoint adjudication committee, data management team, and other individuals or groups overseeing the trial, if applicable (see Item 21a for data monitoring committee)                         | _____n/a_____            |

|    |                                                           |     |                                                                                                               |                           |
|----|-----------------------------------------------------------|-----|---------------------------------------------------------------------------------------------------------------|---------------------------|
| 1  | <b>Introduction</b>                                       |     |                                                                                                               |                           |
| 2  |                                                           |     |                                                                                                               |                           |
| 3  | Background and                                            | 6a  | Description of research question and justification for undertaking the trial, including summary of relevant   | _____5-6_____             |
| 4  | rationale                                                 |     | studies (published and unpublished) examining benefits and harms for each intervention                        |                           |
| 5  |                                                           |     |                                                                                                               |                           |
| 6  |                                                           | 6b  | Explanation for choice of comparators                                                                         | _____10_____              |
| 7  |                                                           |     |                                                                                                               |                           |
| 8  | Objectives                                                | 7   | Specific objectives or hypotheses                                                                             | _____6_____               |
| 9  |                                                           |     |                                                                                                               |                           |
| 10 | Trial design                                              | 8   | Description of trial design including type of trial (eg, parallel group, crossover, factorial, single group), |                           |
| 11 |                                                           |     | allocation ratio, and framework (eg, superiority, equivalence, noninferiority, exploratory)                   | _____6_____               |
| 12 |                                                           |     |                                                                                                               |                           |
| 13 |                                                           |     |                                                                                                               |                           |
| 14 | <b>Methods: Participants, interventions, and outcomes</b> |     |                                                                                                               |                           |
| 15 |                                                           |     |                                                                                                               |                           |
| 16 | Study setting                                             | 9   | Description of study settings (eg, community clinic, academic hospital) and list of countries where data will | _____6-7, 9_____          |
| 17 |                                                           |     | be collected. Reference to where list of study sites can be obtained                                          |                           |
| 18 |                                                           |     |                                                                                                               |                           |
| 19 | Eligibility criteria                                      | 10  | Inclusion and exclusion criteria for participants. If applicable, eligibility criteria for study centres and  | _____7,9,20_____          |
| 20 |                                                           |     | individuals who will perform the interventions (eg, surgeons, psychotherapists)                               |                           |
| 21 |                                                           |     |                                                                                                               |                           |
| 22 | Interventions                                             | 11a | Interventions for each group with sufficient detail to allow replication, including how and when they will be | _____9-10_____            |
| 23 |                                                           |     | administered                                                                                                  |                           |
| 24 |                                                           |     |                                                                                                               |                           |
| 25 |                                                           | 11b | Criteria for discontinuing or modifying allocated interventions for a given trial participant (eg, drug dose  | _____n/a_____             |
| 26 |                                                           |     | change in response to harms, participant request, or improving/worsening disease)                             |                           |
| 27 |                                                           |     |                                                                                                               |                           |
| 28 |                                                           | 11c | Strategies to improve adherence to intervention protocols, and any procedures for monitoring adherence        | _____9-10_____            |
| 29 |                                                           |     | (eg, drug tablet return, laboratory tests)                                                                    |                           |
| 30 |                                                           |     |                                                                                                               |                           |
| 31 |                                                           | 11d | Relevant concomitant care and interventions that are permitted or prohibited during the trial                 | _____7_____               |
| 32 |                                                           |     |                                                                                                               |                           |
| 33 | Outcomes                                                  | 12  | Primary, secondary, and other outcomes, including the specific measurement variable (eg, systolic blood       | _____10-12_____           |
| 34 |                                                           |     | pressure), analysis metric (eg, change from baseline, final value, time to event), method of aggregation (eg, |                           |
| 35 |                                                           |     | median, proportion), and time point for each outcome. Explanation of the clinical relevance of chosen         |                           |
| 36 |                                                           |     | efficacy and harm outcomes is strongly recommended                                                            |                           |
| 37 |                                                           |     |                                                                                                               |                           |
| 38 | Participant timeline                                      | 13  | Time schedule of enrolment, interventions (including any run-ins and washouts), assessments, and visits for   | _____8-10, 19, 21-22_____ |
| 39 |                                                           |     | participants. A schematic diagram is highly recommended (see Figure)                                          |                           |
| 40 |                                                           |     |                                                                                                               |                           |
| 41 |                                                           |     |                                                                                                               |                           |
| 42 |                                                           |     |                                                                                                               |                           |



|   |             |    |                                                                                                                                                                                       |                |
|---|-------------|----|---------------------------------------------------------------------------------------------------------------------------------------------------------------------------------------|----------------|
| 1 | Sample size | 14 | Estimated number of participants needed to achieve study objectives and how it was determined, including clinical and statistical assumptions supporting any sample size calculations | ___6, 13-14___ |
| 2 |             |    |                                                                                                                                                                                       |                |
| 3 |             |    |                                                                                                                                                                                       |                |
| 4 | Recruitment | 15 | Strategies for achieving adequate participant enrolment to reach target sample size                                                                                                   | ___7-8___      |
| 5 |             |    |                                                                                                                                                                                       |                |

### 7 **Methods: Assignment of interventions (for controlled trials)**

#### 8 Allocation:

|    |                                  |     |                                                                                                                                                                                                                                                                                                                                                          |           |
|----|----------------------------------|-----|----------------------------------------------------------------------------------------------------------------------------------------------------------------------------------------------------------------------------------------------------------------------------------------------------------------------------------------------------------|-----------|
| 9  |                                  |     |                                                                                                                                                                                                                                                                                                                                                          |           |
| 10 | Sequence generation              | 16a | Method of generating the allocation sequence (eg, computer-generated random numbers), and list of any factors for stratification. To reduce predictability of a random sequence, details of any planned restriction (eg, blocking) should be provided in a separate document that is unavailable to those who enrol participants or assign interventions | ___8___   |
| 11 |                                  |     |                                                                                                                                                                                                                                                                                                                                                          |           |
| 12 |                                  |     |                                                                                                                                                                                                                                                                                                                                                          |           |
| 13 |                                  |     |                                                                                                                                                                                                                                                                                                                                                          |           |
| 14 |                                  |     |                                                                                                                                                                                                                                                                                                                                                          |           |
| 15 |                                  |     |                                                                                                                                                                                                                                                                                                                                                          |           |
| 16 | Allocation concealment mechanism | 16b | Mechanism of implementing the allocation sequence (eg, central telephone; sequentially numbered, opaque, sealed envelopes), describing any steps to conceal the sequence until interventions are assigned                                                                                                                                                | ___8___   |
| 17 |                                  |     |                                                                                                                                                                                                                                                                                                                                                          |           |
| 18 |                                  |     |                                                                                                                                                                                                                                                                                                                                                          |           |
| 19 |                                  |     |                                                                                                                                                                                                                                                                                                                                                          |           |
| 20 | Implementation                   | 16c | Who will generate the allocation sequence, who will enrol participants, and who will assign participants to interventions                                                                                                                                                                                                                                | ___8___   |
| 21 |                                  |     |                                                                                                                                                                                                                                                                                                                                                          |           |
| 22 |                                  |     |                                                                                                                                                                                                                                                                                                                                                          |           |
| 23 |                                  |     |                                                                                                                                                                                                                                                                                                                                                          |           |
| 24 | Blinding (masking)               | 17a | Who will be blinded after assignment to interventions (eg, trial participants, care providers, outcome assessors, data analysts), and how                                                                                                                                                                                                                | ___n/a___ |
| 25 |                                  |     |                                                                                                                                                                                                                                                                                                                                                          |           |
| 26 |                                  |     |                                                                                                                                                                                                                                                                                                                                                          |           |
| 27 |                                  | 17b | If blinded, circumstances under which unblinding is permissible, and procedure for revealing a participant's allocated intervention during the trial                                                                                                                                                                                                     | ___n/a___ |
| 28 |                                  |     |                                                                                                                                                                                                                                                                                                                                                          |           |
| 29 |                                  |     |                                                                                                                                                                                                                                                                                                                                                          |           |
| 30 |                                  |     |                                                                                                                                                                                                                                                                                                                                                          |           |

### 31 **Methods: Data collection, management, and analysis**

|    |                         |     |                                                                                                                                                                                                                                                                                                                                                                                                              |             |
|----|-------------------------|-----|--------------------------------------------------------------------------------------------------------------------------------------------------------------------------------------------------------------------------------------------------------------------------------------------------------------------------------------------------------------------------------------------------------------|-------------|
| 32 |                         |     |                                                                                                                                                                                                                                                                                                                                                                                                              |             |
| 33 | Data collection methods | 18a | Plans for assessment and collection of outcome, baseline, and other trial data, including any related processes to promote data quality (eg, duplicate measurements, training of assessors) and a description of study instruments (eg, questionnaires, laboratory tests) along with their reliability and validity, if known. Reference to where data collection forms can be found, if not in the protocol | ___10-13___ |
| 34 |                         |     |                                                                                                                                                                                                                                                                                                                                                                                                              |             |
| 35 |                         |     |                                                                                                                                                                                                                                                                                                                                                                                                              |             |
| 36 |                         |     |                                                                                                                                                                                                                                                                                                                                                                                                              |             |
| 37 |                         |     |                                                                                                                                                                                                                                                                                                                                                                                                              |             |
| 38 |                         | 18b | Plans to promote participant retention and complete follow-up, including list of any outcome data to be collected for participants who discontinue or deviate from intervention protocols                                                                                                                                                                                                                    | ___12-13___ |
| 39 |                         |     |                                                                                                                                                                                                                                                                                                                                                                                                              |             |
| 40 |                         |     |                                                                                                                                                                                                                                                                                                                                                                                                              |             |
| 41 |                         |     |                                                                                                                                                                                                                                                                                                                                                                                                              |             |
| 42 |                         |     |                                                                                                                                                                                                                                                                                                                                                                                                              |             |

|    |                                 |     |                                                                                                                                                                                                                                                                                                                                       |                   |
|----|---------------------------------|-----|---------------------------------------------------------------------------------------------------------------------------------------------------------------------------------------------------------------------------------------------------------------------------------------------------------------------------------------|-------------------|
| 1  | Data management                 | 19  | Plans for data entry, coding, security, and storage, including any related processes to promote data quality (eg, double data entry; range checks for data values). Reference to where details of data management procedures can be found, if not in the protocol                                                                     | _____ 13 _____    |
| 2  |                                 |     |                                                                                                                                                                                                                                                                                                                                       |                   |
| 3  |                                 |     |                                                                                                                                                                                                                                                                                                                                       |                   |
| 4  |                                 |     |                                                                                                                                                                                                                                                                                                                                       |                   |
| 5  | Statistical methods             | 20a | Statistical methods for analysing primary and secondary outcomes. Reference to where other details of the statistical analysis plan can be found, if not in the protocol                                                                                                                                                              | _____ 13-15 _____ |
| 6  |                                 |     |                                                                                                                                                                                                                                                                                                                                       |                   |
| 7  |                                 |     |                                                                                                                                                                                                                                                                                                                                       |                   |
| 8  |                                 | 20b | Methods for any additional analyses (eg, subgroup and adjusted analyses)                                                                                                                                                                                                                                                              | _____ 14-15 _____ |
| 9  |                                 |     |                                                                                                                                                                                                                                                                                                                                       |                   |
| 10 |                                 | 20c | Definition of analysis population relating to protocol non-adherence (eg, as randomised analysis), and any statistical methods to handle missing data (eg, multiple imputation)                                                                                                                                                       | _____ 14 _____    |
| 11 |                                 |     |                                                                                                                                                                                                                                                                                                                                       |                   |
| 12 |                                 |     |                                                                                                                                                                                                                                                                                                                                       |                   |
| 13 |                                 |     |                                                                                                                                                                                                                                                                                                                                       |                   |
| 14 | <b>Methods: Monitoring</b>      |     |                                                                                                                                                                                                                                                                                                                                       |                   |
| 15 |                                 |     |                                                                                                                                                                                                                                                                                                                                       |                   |
| 16 | Data monitoring                 | 21a | Composition of data monitoring committee (DMC); summary of its role and reporting structure; statement of whether it is independent from the sponsor and competing interests; and reference to where further details about its charter can be found, if not in the protocol. Alternatively, an explanation of why a DMC is not needed | _____ n/a _____   |
| 17 |                                 |     |                                                                                                                                                                                                                                                                                                                                       |                   |
| 18 |                                 |     |                                                                                                                                                                                                                                                                                                                                       |                   |
| 19 |                                 |     |                                                                                                                                                                                                                                                                                                                                       |                   |
| 20 |                                 |     |                                                                                                                                                                                                                                                                                                                                       |                   |
| 21 |                                 |     |                                                                                                                                                                                                                                                                                                                                       |                   |
| 22 |                                 | 21b | Description of any interim analyses and stopping guidelines, including who will have access to these interim results and make the final decision to terminate the trial                                                                                                                                                               | _____ 12-13 _____ |
| 23 |                                 |     |                                                                                                                                                                                                                                                                                                                                       |                   |
| 24 |                                 |     |                                                                                                                                                                                                                                                                                                                                       |                   |
| 25 | Harms                           | 22  | Plans for collecting, assessing, reporting, and managing solicited and spontaneously reported adverse events and other unintended effects of trial interventions or trial conduct                                                                                                                                                     | _____ 12-13 _____ |
| 26 |                                 |     |                                                                                                                                                                                                                                                                                                                                       |                   |
| 27 |                                 |     |                                                                                                                                                                                                                                                                                                                                       |                   |
| 28 | Auditing                        | 23  | Frequency and procedures for auditing trial conduct, if any, and whether the process will be independent from investigators and the sponsor                                                                                                                                                                                           | _____ 13 _____    |
| 29 |                                 |     |                                                                                                                                                                                                                                                                                                                                       |                   |
| 30 |                                 |     |                                                                                                                                                                                                                                                                                                                                       |                   |
| 31 |                                 |     |                                                                                                                                                                                                                                                                                                                                       |                   |
| 32 | <b>Ethics and dissemination</b> |     |                                                                                                                                                                                                                                                                                                                                       |                   |
| 33 |                                 |     |                                                                                                                                                                                                                                                                                                                                       |                   |
| 34 | Research ethics approval        | 24  | Plans for seeking research ethics committee/institutional review board (REC/IRB) approval                                                                                                                                                                                                                                             | _____ 16 _____    |
| 35 |                                 |     |                                                                                                                                                                                                                                                                                                                                       |                   |
| 36 |                                 |     |                                                                                                                                                                                                                                                                                                                                       |                   |
| 37 | Protocol amendments             | 25  | Plans for communicating important protocol modifications (eg, changes to eligibility criteria, outcomes, analyses) to relevant parties (eg, investigators, REC/IRBs, trial participants, trial registries, journals, regulators)                                                                                                      | _____ 17 _____    |
| 38 |                                 |     |                                                                                                                                                                                                                                                                                                                                       |                   |
| 39 |                                 |     |                                                                                                                                                                                                                                                                                                                                       |                   |
| 40 |                                 |     |                                                                                                                                                                                                                                                                                                                                       |                   |
| 41 |                                 |     |                                                                                                                                                                                                                                                                                                                                       |                   |
| 42 |                                 |     |                                                                                                                                                                                                                                                                                                                                       |                   |
| 43 |                                 |     |                                                                                                                                                                                                                                                                                                                                       |                   |
| 44 |                                 |     |                                                                                                                                                                                                                                                                                                                                       |                   |
| 45 |                                 |     |                                                                                                                                                                                                                                                                                                                                       |                   |
| 46 |                                 |     |                                                                                                                                                                                                                                                                                                                                       |                   |

|    |                               |     |                                                                                                                                                                                                                                                                                     |                      |
|----|-------------------------------|-----|-------------------------------------------------------------------------------------------------------------------------------------------------------------------------------------------------------------------------------------------------------------------------------------|----------------------|
| 1  | Consent or assent             | 26a | Who will obtain informed consent or assent from potential trial participants or authorised surrogates, and how (see Item 32)                                                                                                                                                        | ___ 8,16 ___         |
| 2  |                               |     |                                                                                                                                                                                                                                                                                     |                      |
| 3  |                               |     |                                                                                                                                                                                                                                                                                     |                      |
| 4  |                               | 26b | Additional consent provisions for collection and use of participant data and biological specimens in ancillary studies, if applicable                                                                                                                                               | ___ 16 ___           |
| 5  |                               |     |                                                                                                                                                                                                                                                                                     |                      |
| 6  |                               |     |                                                                                                                                                                                                                                                                                     |                      |
| 7  | Confidentiality               | 27  | How personal information about potential and enrolled participants will be collected, shared, and maintained in order to protect confidentiality before, during, and after the trial                                                                                                | ___ 13, 16-17 ___    |
| 8  |                               |     |                                                                                                                                                                                                                                                                                     |                      |
| 9  |                               |     |                                                                                                                                                                                                                                                                                     |                      |
| 10 | Declaration of interests      | 28  | Financial and other competing interests for principal investigators for the overall trial and each study site                                                                                                                                                                       | ___ 1 ___            |
| 11 |                               |     |                                                                                                                                                                                                                                                                                     |                      |
| 12 |                               |     |                                                                                                                                                                                                                                                                                     |                      |
| 13 | Access to data                | 29  | Statement of who will have access to the final trial dataset, and disclosure of contractual agreements that limit such access for investigators                                                                                                                                     | ___ 17 ___           |
| 14 |                               |     |                                                                                                                                                                                                                                                                                     |                      |
| 15 |                               |     |                                                                                                                                                                                                                                                                                     |                      |
| 16 |                               |     |                                                                                                                                                                                                                                                                                     |                      |
| 17 | Ancillary and post-trial care | 30  | Provisions, if any, for ancillary and post-trial care, and for compensation to those who suffer harm from trial participation                                                                                                                                                       | ___ 12,17 ___        |
| 18 |                               |     |                                                                                                                                                                                                                                                                                     |                      |
| 19 |                               |     |                                                                                                                                                                                                                                                                                     |                      |
| 20 | Dissemination policy          | 31a | Plans for investigators and sponsor to communicate trial results to participants, healthcare professionals, the public, and other relevant groups (eg, via publication, reporting in results databases, or other data sharing arrangements), including any publication restrictions | ___ 17 ___           |
| 21 |                               |     |                                                                                                                                                                                                                                                                                     |                      |
| 22 |                               |     |                                                                                                                                                                                                                                                                                     |                      |
| 23 |                               |     |                                                                                                                                                                                                                                                                                     |                      |
| 24 |                               | 31b | Authorship eligibility guidelines and any intended use of professional writers                                                                                                                                                                                                      | ___ 17 ___           |
| 25 |                               |     |                                                                                                                                                                                                                                                                                     |                      |
| 26 |                               | 31c | Plans, if any, for granting public access to the full protocol, participant-level dataset, and statistical code                                                                                                                                                                     | ___ 17 ___           |
| 27 |                               |     |                                                                                                                                                                                                                                                                                     |                      |
| 28 |                               |     |                                                                                                                                                                                                                                                                                     |                      |
| 29 | <b>Appendices</b>             |     |                                                                                                                                                                                                                                                                                     |                      |
| 30 |                               |     |                                                                                                                                                                                                                                                                                     |                      |
| 31 | Informed consent materials    | 32  | Model consent form and other related documentation given to participants and authorised surrogates                                                                                                                                                                                  | ___ Not included ___ |
| 32 |                               |     |                                                                                                                                                                                                                                                                                     |                      |
| 33 |                               |     |                                                                                                                                                                                                                                                                                     |                      |
| 34 | Biological specimens          | 33  | Plans for collection, laboratory evaluation, and storage of biological specimens for genetic or molecular analysis in the current trial and for future use in ancillary studies, if applicable                                                                                      | ___ n/a ___          |
| 35 |                               |     |                                                                                                                                                                                                                                                                                     |                      |
| 36 |                               |     |                                                                                                                                                                                                                                                                                     |                      |

\*It is strongly recommended that this checklist be read in conjunction with the SPIRIT 2013 Explanation & Elaboration for important clarification on the items. Amendments to the protocol should be tracked and dated. The SPIRIT checklist is copyrighted by the SPIRIT Group under the Creative Commons [“Attribution-NonCommercial-NoDerivs 3.0 Unported”](https://creativecommons.org/licenses/by-nc-nd/3.0/) license.
